# Supplementary material for: Changes in the phyllosphere and rhizosphere of a cloud forest tree fern along an elevation gradient
Source: Research Square preprint supplement (doi:10.21203/rs.3.rs-5374836/v1), 2024-11-15
Supplement: Supplementary file 1 [file 13293776f6a736280b2ca53e.xlsx]

## Sheet: Core taxonomy
ASV belonging to the core microbiome
Bacterial phyllosphere
Kingdom	Phylum	Class	Order	Family	Genus
k__Bacteria	p__Proteobacteria	c__Alphaproteobacteria	o__Rhizobiales_A_504705	f__Beijerinckiaceae	g__Lichenihabitans
k__Bacteria	p__Proteobacteria	c__Alphaproteobacteria	o__Acetobacterales	f__Acetobacteraceae	g__
k__Bacteria	p__Proteobacteria	c__Alphaproteobacteria	o__Rhizobiales_A_504705	f__Beijerinckiaceae	g__
k__Bacteria	p__Proteobacteria	c__Alphaproteobacteria	o__Rhizobiales_A_504705	f__	g__
k__Bacteria	p__Actinobacteriota	c__Actinomycetia	o__Mycobacteriales	f__	g__
k__Bacteria	p__Verrucomicrobiota	c__Verrucomicrobiae	o__Chthoniobacterales	f__UBA10450	g__
k__Bacteria	p__Proteobacteria	c__Alphaproteobacteria	o__	f__	g__
k__Bacteria	p__Proteobacteria	c__Alphaproteobacteria	o__Sphingomonadales	f__Sphingomonadaceae	g__Sphingomonas_L_486704
k__Bacteria	p__Acidobacteriota	c__Acidobacteriae	o__Acidobacteriales	f__Acidobacteriaceae	g__Terriglobus_A
k__Bacteria	p__Proteobacteria	c__Alphaproteobacteria	o__Rhizobiales_A_504705	f__Beijerinckiaceae	g__Methylobacterium
k__Bacteria	p__	c__	o__	f__	g__
k__Bacteria	p__Bacteroidota	c__Bacteroidia	o__Cytophagales	f__Hymenobacteraceae	g__Hymenobacter_910554
k__Bacteria	p__Acidobacteriota	c__Acidobacteriae	o__Acidobacteriales	f__Acidobacteriaceae	g__
k__Bacteria	p__Acidobacteriota	c__Acidobacteriae	o__Acidobacteriales	f__Acidobacteriaceae	g__Granulicella_D
k__Bacteria	p__Bacteroidota	c__Bacteroidia	o__Cytophagales	f__Spirosomaceae	g__Spirosoma
k__Bacteria	p__Spirochaetota	c__	o__	f__	g__
k__Bacteria	p__Proteobacteria	c__Alphaproteobacteria	o__Caulobacterales	f__Caulobacteraceae	g__
k__Bacteria	p__Cyanobacteria	c__Cyanobacteriia	o__Cyanobacteriales	f__Coleofasciculaceae_23353	g__SIO2C1
k__Bacteria	p__Planctomycetota	c__Planctomycetia	o__Isosphaerales	f__Isosphaeraceae	g__
k__Bacteria	p__Proteobacteria	c__Alphaproteobacteria	o__Sphingomonadales	f__Sphingomonadaceae	g__
k__Bacteria	p__Planctomycetota	c__Phycisphaerae	o__Tepidisphaerales	f__Tepidisphaeraceae	g__UBA2421
k__Bacteria	p__Bacteroidota	c__Bacteroidia	o__Sphingobacteriales	f__Sphingobacteriaceae	g__Mucilaginibacter_A
k__Bacteria	p__Cyanobacteria	c__Cyanobacteriia	o__	f__	g__
k__Bacteria	p__Proteobacteria	c__Gammaproteobacteria	o__	f__	g__
k__Bacteria	p__Firmicutes_A	c__Clostridia_258483	o__Clostridiales	f__Clostridiaceae_222000	g__Clostridium_S_221419
k__Bacteria	p__Proteobacteria	c__Gammaproteobacteria	o__Burkholderiales_592522	f__Burkholderiaceae_A_592522	g__
k__Bacteria	p__Acidobacteriota	c__Acidobacteriae	o__Acidobacteriales	f__Acidobacteriaceae	g__Granulicella_C_413654
k__Bacteria	p__Proteobacteria	c__Alphaproteobacteria	o__Sphingomonadales	f__Kordiimonadaceae_482971	g__Kordiimonas_482971
k__Bacteria	p__Armatimonadota	c__Armatimonadia	o__Armatimonadales	f__Armatimonadaceae	g__Armatimonas
k__Bacteria	p__Actinobacteriota	c__Actinomycetia	o__Mycobacteriales	f__Pseudonocardiaceae	g__Pseudonocardia
k__Bacteria	p__Myxococcota_A_473307	c__	o__	f__	g__
k__Bacteria	p__Firmicutes_A	c__Clostridia_258483	o__Clostridiales	f__Clostridiaceae_222000	g__Clostridium_I
k__Bacteria	p__Proteobacteria	c__Gammaproteobacteria	o__Enterobacterales_A_737866	f__Pasteurellaceae	g__Chelonobacter_732843
k__Bacteria	p__Actinobacteriota	c__Actinomycetia	o__Mycobacteriales	f__Mycobacteriaceae	g__Mycobacterium
k__Bacteria	p__Proteobacteria	c__Gammaproteobacteria	o__Enterobacterales_A_737866	f__Alteromonadaceae_665222	g__Pseudoalteromonas
k__Bacteria	p__Bdellovibrionota_E	c__Bdellovibrionia_A_473294	o__Bdellovibrionales	f__SG-bin7	g__SG-bin7
k__Bacteria	p__Armatimonadota	c__Abditibacteria	o__Abditibacteriales	f__Abditibacteriaceae	g__Abditibacterium
k__Bacteria	p__Myxococcota_A_473307	c__Polyangia_463783	o__Polyangiales	f__Polyangiaceae	g__Labilithrix
k__Bacteria	p__Armatimonadota	c__Fimbriimonadia	o__Fimbriimonadales	f__Fimbriimonadaceae	g__
k__Bacteria	p__Bdellovibrionota_E	c__Bdellovibrionia_A_473294	o__Bdellovibrionales	f__Bdellovibrionaceae	g__Ga0074137
k__Bacteria	p__Firmicutes_D	c__Bacilli	o__Paenibacillales	f__Paenibacillaceae_367444	g__Paenibacillus_J_366884
k__Bacteria	p__Proteobacteria	c__	o__	f__	g__
k__Bacteria	p__Myxococcota_A_473307	c__Polyangia_463783	o__Polyangiales	f__Polyangiaceae	g__
k__Bacteria	p__Myxococcota_A_437813	c__Polyangia_437813	o__Haliangiales_437813	f__Haliangiaceae_437813	g__
Bacterial rhizosphere
Kingdom	Phylum	Class	Order	Family	Genus
k__Bacteria	p__Acidobacteriota	c__Acidobacteriae	o__Acidoferrales	f__UBA7541	g__Acidoferrum
k__Bacteria	p__Acidobacteriota	c__Acidobacteriae	o__Acidoferrales	f__UBA7541	g__Palsa-295
k__Bacteria	p__	c__	o__	f__	g__
k__Bacteria	p__Proteobacteria	c__Alphaproteobacteria	o__Rhizobiales_A_504705	f__Xanthobacteraceae_503485	g__
k__Bacteria	p__Proteobacteria	c__Alphaproteobacteria	o__	f__	g__
k__Bacteria	p__Proteobacteria	c__Gammaproteobacteria	o__Steroidobacterales	f__Steroidobacteraceae	g__
k__Bacteria	p__Acidobacteriota	c__Acidobacteriae	o__Acidobacteriales	f__SbA1	g__Gp1-AA122
k__Bacteria	p__Actinobacteriota	c__Actinomycetia	o__	f__	g__
k__Bacteria	p__Acidobacteriota	c__Acidobacteriae	o__Bryobacterales	f__Bryobacteraceae	g__
k__Bacteria	p__Proteobacteria	c__Alphaproteobacteria	o__Azospirillales_507929	f__Azospirillaceae_507917	g__
k__Bacteria	p__Acidobacteriota	c__Acidobacteriae	o__Bryobacterales	f__Bryobacteraceae	g__Palsa-187
k__Bacteria	p__Proteobacteria	c__Gammaproteobacteria	o__Steroidobacterales	f__Steroidobacteraceae	g__Bog-1198
k__Bacteria	p__Acidobacteriota	c__Acidobacteriae	o__Acidobacteriales	f__SbA1	g__
k__Bacteria	p__Eremiobacterota	c__Eremiobacteria	o__Baltobacterales	f__Baltobacteraceae	g__Tyrphobacter
k__Bacteria	p__Proteobacteria	c__Alphaproteobacteria	o__Acetobacterales	f__Acetobacteraceae	g__
k__Bacteria	p__Verrucomicrobiota	c__Verrucomicrobiae	o__Pedosphaerales	f__UBA11358	g__UBA11358
k__Bacteria	p__Proteobacteria	c__Alphaproteobacteria	o__Rhizobiales_A_504705	f__Beijerinckiaceae	g__Roseiarcus
k__Bacteria	p__Proteobacteria	c__Alphaproteobacteria	o__Rhizobiales_A_504705	f__Xanthobacteraceae_503485	g__Bradyrhizobium
k__Bacteria	p__Acidobacteriota	c__Acidobacteriae	o__Acidoferrales	f__UBA7541	g__
k__Bacteria	p__Acidobacteriota	c__Acidobacteriae	o__Acidobacteriales	f__Acidobacteriaceae	g__
k__Bacteria	p__Proteobacteria	c__Gammaproteobacteria	o__	f__	g__
k__Bacteria	p__Planctomycetota	c__Planctomycetia	o__Gemmatales	f__Gemmataceae	g__
k__Bacteria	p__Planctomycetota	c__Phycisphaerae	o__Tepidisphaerales	f__Tepidisphaeraceae	g__UBA2421
k__Bacteria	p__Proteobacteria	c__Alphaproteobacteria	o__Dongiales	f__Dongiaceae	g__Hypericibacter
k__Bacteria	p__Acidobacteriota	c__Acidobacteriae	o__Bryobacterales	f__Bryobacteraceae	g__Solibacter
k__Bacteria	p__Verrucomicrobiota	c__Verrucomicrobiae	o__Pedosphaerales	f__	g__
k__Bacteria	p__Proteobacteria	c__Alphaproteobacteria	o__Micropepsales	f__Micropepsaceae	g__
k__Bacteria	p__Acidobacteriota	c__Acidobacteriae	o__Acidobacteriales	f__Gp1-AA117	g__Gp1-AA17
k__Bacteria	p__Gemmatimonadota	c__Gemmatimonadetes	o__Gemmatimonadales	f__Gemmatimonadaceae	g__
k__Bacteria	p__Proteobacteria	c__Alphaproteobacteria	o__Caulobacterales	f__Caulobacteraceae	g__
k__Bacteria	p__Myxococcota_A_473307	c__Polyangia_463783	o__Polyangiales	f__Polyangiaceae	g__
k__Bacteria	p__Verrucomicrobiota	c__Verrucomicrobiae	o__Pedosphaerales	f__Pedosphaeraceae	g__Pedosphaera
k__Bacteria	p__Myxococcota_A_473307	c__Polyangia_463783	o__Polyangiales	f__Polyangiaceae	g__Palsa-1150
k__Bacteria	p__Acidobacteriota	c__Acidobacteriae	o__Acidobacteriales	f__SbA1	g__Bog-209
k__Bacteria	p__Bacteroidota	c__Bacteroidia	o__Chitinophagales	f__Chitinophagaceae_966727	g__Puia
k__Bacteria	p__Verrucomicrobiota	c__Verrucomicrobiae	o__Chthoniobacterales	f__	g__
k__Bacteria	p__Proteobacteria	c__Gammaproteobacteria	o__Burkholderiales_597437	f__Casimicrobiaceae	g__VBCG01
k__Bacteria	p__Acidobacteriota	c__Vicinamibacteria	o__Vicinamibacterales	f__UBA2999	g__Gp6-AA45
k__Bacteria	p__Eremiobacterota	c__Eremiobacteria	o__Eremiobacterales	f__Eremiobacteraceae	g__CADDZI01
k__Bacteria	p__Actinobacteriota	c__Acidimicrobiia_401430	o__Acidimicrobiales	f__RAAP-2	g__Bog-515
k__Bacteria	p__Acidobacteriota	c__Acidobacteriae	o__Acidobacteriales	f__Koribacteraceae	g__Bog-257
k__Bacteria	p__Planctomycetota	c__Planctomycetia	o__Isosphaerales	f__Isosphaeraceae	g__
k__Bacteria	p__Acidobacteriota	c__Acidobacteriae	o__Acidobacteriales	f__Acidobacteriaceae	g__Edaphobacter_415416
k__Bacteria	p__Proteobacteria	c__Alphaproteobacteria	o__Azospirillales_507929	f__Azospirillaceae_507917	g__Azospirillum
k__Bacteria	p__Eremiobacterota	c__Eremiobacteria	o__Baltobacterales	f__Baltobacteraceae	g__
k__Bacteria	p__Proteobacteria	c__Gammaproteobacteria	o__Burkholderiales_592524	f__Burkholderiaceae_A_580492	g__Paraburkholderia_580243
k__Bacteria	p__Myxococcota_A_473307	c__Myxococcia	o__Myxococcales	f__Myxococcaceae	g__
k__Bacteria	p__Acidobacteriota	c__Acidobacteriae	o__Acidobacteriales	f__	g__
k__Bacteria	p__Actinobacteriota	c__Thermoleophilia	o__Solirubrobacterales	f__Solirubrobacteraceae_405343	g__Palsa-513
k__Bacteria	p__Proteobacteria	c__Alphaproteobacteria	o__Reyranellales	f__Reyranellaceae	g__Reyranella
k__Bacteria	p__Chloroflexota	c__Ktedonobacteria	o__Ktedonobacterales	f__Ktedonobacteraceae	g__Thermosporothrix
k__Bacteria	p__Chloroflexota	c__Ktedonobacteria	o__Ktedonobacterales	f__Ktedonobacteraceae	g__CF-154
k__Bacteria	p__Proteobacteria	c__Gammaproteobacteria	o__Burkholderiales_595427	f__Burkholderiaceae_A_595427	g__VBCK01
k__Bacteria	p__Verrucomicrobiota	c__Verrucomicrobiae	o__Opitutales	f__Opitutaceae	g__
k__Bacteria	p__Actinobacteriota	c__Acidimicrobiia_401430	o__Acidimicrobiales	f__Acidimicrobiaceae_401171	g__Acidiferrimicrobium
k__Bacteria	p__Acidobacteriota	c__Acidobacteriae	o__Acidobacteriales	f__Acidobacteriaceae	g__Terracidiphilus_417258
k__Bacteria	p__Acidobacteriota	c__Vicinamibacteria	o__Vicinamibacterales	f__SCN-69-37	g__SCN-69-37
k__Bacteria	p__Actinobacteriota	c__Acidimicrobiia_401430	o__Acidimicrobiales	f__RAAP-2	g__RAAP-2
k__Bacteria	p__Bacteroidota	c__Bacteroidia	o__Chitinophagales	f__Chitinophagaceae_966727	g__
k__Bacteria	p__Elusimicrobiota	c__Elusimicrobia_984204	o__2-01-FULL-59-12	f__2-01-FULL-59-12	g__2-01-FULL-59-12
k__Bacteria	p__Acidobacteriota	c__Acidobacteriae	o__	f__	g__
k__Bacteria	p__Proteobacteria	c__Alphaproteobacteria	o__Rhizobiales_A_504721	f__Hyphomicrobiaceae	g__
k__Bacteria	p__Actinobacteriota	c__Actinomycetia	o__Mycobacteriales	f__Mycobacteriaceae	g__Mycobacterium
k__Bacteria	p__Actinobacteriota	c__Actinomycetia	o__Streptosporangiales	f__Streptosporangiaceae	g__
k__Bacteria	p__Acidobacteriota	c__Acidobacteriae	o__Acidobacteriales	f__Acidobacteriaceae	g__Acidisarcina
k__Bacteria	p__Proteobacteria	c__Alphaproteobacteria	o__Caulobacterales	f__Caulobacteraceae	g__Phenylobacterium
k__Bacteria	p__Acidobacteriota	c__Acidobacteriae	o__Acidobacteriales	f__SbA1	g__Sulfotelmatobacter
k__Bacteria	p__Desulfobacterota_B	c__Binatia	o__Binatales	f__Binataceae	g__Binatus
k__Bacteria	p__Actinobacteriota	c__Acidimicrobiia_401430	o__Acidimicrobiales	f__Acidimicrobiaceae_401414	g__Aciditerrimonas
k__Bacteria	p__Actinobacteriota	c__Actinomycetia	o__Streptosporangiales	f__Streptosporangiaceae	g__Trebonia
k__Bacteria	p__Actinobacteriota	c__	o__	f__	g__
k__Bacteria	p__Chlamydiota	c__Chlamydiia	o__	f__	g__
k__Bacteria	p__Proteobacteria	c__Gammaproteobacteria	o__Burkholderiales_592524	f__Burkholderiaceae_A_580492	g__
k__Bacteria	p__Verrucomicrobiota	c__Verrucomicrobiae	o__Palsa-1439	f__Palsa-1439	g__DRVI01
k__Bacteria	p__Chloroflexota	c__Ktedonobacteria	o__Ktedonobacterales	f__Ktedonobacteraceae	g__
k__Bacteria	p__Acidobacteriota	c__Acidobacteriae	o__Acidobacteriales	f__SbA1	g__Gp1-AA133
k__Bacteria	p__Planctomycetota	c__Planctomycetia	o__Planctomycetales	f__UBA10511	g__UBA10511
k__Bacteria	p__Bacteroidota	c__Bacteroidia	o__Sphingobacteriales	f__Sphingobacteriaceae	g__Mucilaginibacter_A
k__Archaea	p__Thermoproteota	c__Nitrososphaeria_A	o__Nitrososphaerales	f__	g__
k__Bacteria	p__Acidobacteriota	c__Acidobacteriae	o__Bryobacterales	f__Bryobacteraceae	g__KBS-96
k__Bacteria	p__Actinobacteriota	c__Acidimicrobiia_401430	o__Acidimicrobiales	f__RAAP-2	g__
k__Bacteria	p__Chloroflexota	c__Ktedonobacteria	o__Ktedonobacterales	f__Ktedonobacteraceae	g__Dictyobacter
k__Bacteria	p__Planctomycetota	c__Planctomycetia	o__Pirellulales	f__	g__
k__Bacteria	p__Proteobacteria	c__Alphaproteobacteria	o__Rhizobiales_A_504705	f__Beijerinckiaceae	g__
k__Bacteria	p__Planctomycetota	c__Planctomycetia	o__Gemmatales	f__Gemmataceae	g__Limnoglobus
k__Bacteria	p__Acidobacteriota	c__Acidobacteriae	o__20CM-2-55-15	f__20CM-2-55-15	g__DSPE01
k__Bacteria	p__Proteobacteria	c__	o__	f__	g__
k__Bacteria	p__Proteobacteria	c__Alphaproteobacteria	o__UBA9219	f__UBA9219	g__UBA8914
k__Bacteria	p__Proteobacteria	c__Alphaproteobacteria	o__Azospirillales_507929	f__	g__
k__Bacteria	p__Chlamydiota	c__Chlamydiia	o__Chlamydiales_778124	f__Rhabdochlamydiaceae	g__Rhabdochlamydia
k__Bacteria	p__Verrucomicrobiota	c__Verrucomicrobiae	o__Chthoniobacterales	f__Chthoniobacteraceae	g__
k__Bacteria	p__Verrucomicrobiota	c__Verrucomicrobiae	o__Pedosphaerales	f__UBA3939	g__UBA3939
k__Bacteria	p__Myxococcota_A_473307	c__Polyangia_463783	o__Haliangiales_463188	f__Haliangiaceae_463188	g__Haliangium_463188
k__Bacteria	p__Acidobacteriota	c__Acidobacteriae	o__Acidobacteriales	f__Acidobacteriaceae	g__Acidicapsa
k__Bacteria	p__Actinobacteriota	c__Acidimicrobiia_401430	o__IMCC26256	f__PALSA-555	g__SHUY01
k__Bacteria	p__Acidobacteriota	c__Vicinamibacteria	o__Vicinamibacterales	f__UBA2999	g__
k__Bacteria	p__Dormibacterota	c__Dormibacteria	o__Dormibacterales	f__Dormibacteraceae	g__Dormibacter
k__Bacteria	p__Actinobacteriota	c__Acidimicrobiia_401430	o__Acidimicrobiales	f__Bog-793	g__Fen-455
k__Bacteria	p__Myxococcota_A_473307	c__UBA9160	o__UBA9160	f__	g__
k__Bacteria	p__Myxococcota_A_473307	c__Polyangia_463783	o__Palsa-1104_A	f__Fen-1088	g__Fen-1137
k__Bacteria	p__Actinobacteriota	c__Acidimicrobiia_401430	o__Acidimicrobiales	f__RAAP-2	g__Bog-756
k__Bacteria	p__Proteobacteria	c__Alphaproteobacteria	o__Rhizobiales_A_504705	f__Xanthobacteraceae_503485	g__Pseudolabrys_502496
k__Bacteria	p__Actinobacteriota	c__Acidimicrobiia_401430	o__Acidimicrobiales	f__	g__
k__Bacteria	p__Chloroflexota	c__Limnocylindria	o__	f__	g__
k__Bacteria	p__Planctomycetota	c__Planctomycetia	o__Planctomycetales	f__Mal52	g__Symmachiella
k__Bacteria	p__Eremiobacterota	c__Eremiobacteria	o__Baltobacterales	f__Baltobacteraceae	g__Rubrimentiphilum
k__Bacteria	p__FCPU426	c__Palsa-1180	o__Palsa-1180	f__Palsa-1180	g__Bog-1183
k__Bacteria	p__Cyanobacteria	c__Cyanobacteriia	o__Thermosynechococcales	f__Thermosynechococcaceae	g__
k__Bacteria	p__Armatimonadota	c__Fimbriimonadia	o__Fimbriimonadales	f__Fimbriimonadaceae	g__Fimbriimonas
k__Bacteria	p__Proteobacteria	c__Gammaproteobacteria	o__Burkholderiales_597433	f__SG8-39	g__SCGC-AG-212-J23
k__Bacteria	p__Acidobacteriota	c__Acidobacteriae	o__Bryobacterales	f__Bryobacteraceae	g__Fen-178
k__Bacteria	p__Firmicutes_D	c__Bacilli	o__Mycoplasmatales	f__	g__
k__Bacteria	p__Gemmatimonadota	c__Gemmatimonadetes	o__Gemmatimonadales	f__Gemmatimonadaceae	g__AG11
k__Bacteria	p__Acidobacteriota	c__Acidobacteriae	o__Acidobacteriales	f__Acidobacteriaceae	g__Bryocella
k__Bacteria	p__Acidobacteriota	c__Thermoanaerobaculia	o__UBA5704	f__UBA5704	g__
k__Bacteria	p__Acidobacteriota	c__Vicinamibacteria	o__Fen-336	f__Fen-336	g__WYBL01
k__Bacteria	p__Bdellovibrionota_E	c__Bdellovibrionia_A_470743	o__UBA1018	f__UBA1018	g__GWA1-52-35
k__Bacteria	p__Proteobacteria	c__Alphaproteobacteria	o__Rhizobiales_A_504721	f__Rhodomicrobiaceae	g__Rhodomicrobium
k__Bacteria	p__Chlamydiota	c__Chlamydiia	o__Chlamydiales_778124	f__Rhabdochlamydiaceae	g__
k__Bacteria	p__Bacteroidota	c__Bacteroidia	o__	f__	g__
k__Bacteria	p__Proteobacteria	c__Gammaproteobacteria	o__Xanthomonadales_613067	f__Rhodanobacteraceae_613067	g__Rudaea
k__Bacteria	p__Actinobacteriota	c__Thermoleophilia	o__Solirubrobacterales	f__Solirubrobacteraceae_405341	g__Solirubrobacter
k__Bacteria	p__Proteobacteria	c__Gammaproteobacteria	o__Burkholderiales_592522	f__Burkholderiaceae_A_592522	g__
k__Bacteria	p__Armatimonadota	c__Chthonomonadetes	o__Chthonomonadales	f__Chthonomonadaceae	g__Chthonomonas
k__Bacteria	p__Patescibacteria	c__Saccharimonadia	o__Saccharimonadales	f__	g__
k__Bacteria	p__Armatimonadota	c__Armatimonadia	o__Armatimonadales	f__Capsulimonadaceae	g__Capsulimonas
k__Bacteria	p__Verrucomicrobiota	c__Verrucomicrobiae	o__Pedosphaerales	f__UBA11358	g__UBA7542
k__Bacteria	p__Patescibacteria	c__Paceibacteria	o__UBA6257	f__2-01-FULL-56-20	g__CAIWCR01
k__Bacteria	p__Dependentiae	c__Babeliae	o__Babeliales	f__Vermiphilaceae	g__Vermiphilus
k__Bacteria	p__Actinobacteriota	c__Actinomycetia	o__Mycobacteriales	f__	g__
k__Archaea	p__Thermoplasmatota	c__Thermoplasmata_1773	o__RBG-16-68-12	f__RBG-16-68-12	g__RBG-16-68-12
k__Bacteria	p__Verrucomicrobiota	c__Verrucomicrobiae	o__Methylacidiphilales	f__UBA1321	g__LW23
k__Bacteria	p__Bacteroidota	c__Bacteroidia	o__CAILMK01	f__JAAYUY01	g__JAAYUY01
k__Bacteria	p__Bdellovibrionota_E	c__Bdellovibrionia_A_473294	o__Bdellovibrionales	f__SG-bin7	g__SG-bin7
k__Bacteria	p__Verrucomicrobiota	c__Verrucomicrobiae	o__Chthoniobacterales	f__Chthoniobacteraceae	g__Chthoniobacter
k__Bacteria	p__Bacteroidota	c__Bacteroidia	o__Chitinophagales	f__Chitinophagaceae_929731	g__Nemorincola
k__Bacteria	p__Proteobacteria	c__Gammaproteobacteria	o__Burkholderiales_592522	f__Burkholderiaceae_A_592522	g__Variovorax
k__Bacteria	p__Proteobacteria	c__Alphaproteobacteria	o__Rhodospirillales_505895	f__Rhodospirillaceae	g__SCTM01
k__Bacteria	p__Cyanobacteria	c__Vampirovibrionia	o__Obscuribacterales	f__Obscuribacteraceae	g__
k__Bacteria	p__Planctomycetota	c__Planctomycetia	o__Isosphaerales	f__Isosphaeraceae	g__Singulisphaera
k__Bacteria	p__Patescibacteria	c__Saccharimonadia	o__Saccharimonadales	f__UBA4665	g__
k__Bacteria	p__Actinobacteriota	c__Actinomycetia	o__Actinomycetales	f__	g__
k__Bacteria	p__Proteobacteria	c__Alphaproteobacteria	o__Caulobacterales	f__Caulobacteraceae	g__Brevundimonas
k__Bacteria	p__Proteobacteria	c__Alphaproteobacteria	o__Rhizobiales_A_504705	f__Xanthobacteraceae_503485	g__Z2-YC6860
k__Bacteria	p__Proteobacteria	c__Gammaproteobacteria	o__DSM-16500	f__DSM-16500	g__Aquicella_A
k__Bacteria	p__Proteobacteria	c__Alphaproteobacteria	o__Rhizobiales_A_504705	f__	g__
k__Bacteria	p__Proteobacteria	c__Gammaproteobacteria	o__Burkholderiales_597441	f__SHXO01	g__SHXO01
k__Bacteria	p__Dormibacterota	c__Dormibacteria	o__UBA8260	f__UBA8260	g__Palsa-851
k__Bacteria	p__Bacteroidota	c__Bacteroidia	o__Chitinophagales	f__Chitinophagaceae_966727	g__Dinghuibacter
k__Bacteria	p__Planctomycetota	c__Planctomycetia	o__Gemmatales	f__Gemmataceae	g__Fimbriiglobus
k__Bacteria	p__Chlamydiota	c__Chlamydiia	o__Chlamydiales_778124	f__	g__
k__Bacteria	p__Chloroflexota	c__Ktedonobacteria	o__Ktedonobacterales	f__Ktedonobacteraceae	g__UBA11361
k__Bacteria	p__Proteobacteria	c__Gammaproteobacteria	o__Xanthomonadales_613062	f__Rhodanobacteraceae_613062	g__Dyella_A_612714
k__Bacteria	p__Bacteroidota	c__Bacteroidia	o__Cytophagales	f__Cyclobacteriaceae_900466	g__ELB16-189
k__Bacteria	p__Patescibacteria	c__Saccharimonadia	o__Saccharimonadales	f__Saccharimonadaceae	g__Saccharimonas
k__Bacteria	p__Proteobacteria	c__Gammaproteobacteria	o__Xanthomonadales_613062	f__Rhodanobacteraceae_613062	g__
k__Bacteria	p__Acidobacteriota	c__Acidobacteriae	o__Acidobacteriales	f__Acidobacteriaceae	g__Telmatobacter
k__Bacteria	p__Actinobacteriota	c__Thermoleophilia	o__Solirubrobacterales	f__	g__
k__Bacteria	p__Verrucomicrobiota	c__Verrucomicrobiae	o__Chthoniobacterales	f__UBA10450	g__CADDYX01
k__Bacteria	p__Elusimicrobiota	c__Elusimicrobia_984208	o__UBA1565	f__	g__
k__Bacteria	p__Bdellovibrionota_E	c__Bdellovibrionia_A_473294	o__Bdellovibrionales	f__	g__
k__Bacteria	p__Patescibacteria	c__Paceibacteria	o__UBA9983_A	f__SBAW01	g__GWA1-54-10
k__Bacteria	p__Proteobacteria	c__Alphaproteobacteria	o__Acetobacterales	f__Acetobacteraceae	g__Acidocella
k__Bacteria	p__Acidobacteriota	c__Acidobacteriae	o__Bryobacterales	f__Bryobacteraceae	g__Palsa-89
k__Bacteria	p__Proteobacteria	c__Gammaproteobacteria	o__Xanthomonadales_613062	f__Rhodanobacteraceae_613062	g__Dyella_B
k__Bacteria	p__Proteobacteria	c__Gammaproteobacteria	o__Burkholderiales_592522	f__Burkholderiaceae_A_592522	g__Ideonella_A_591966
k__Bacteria	p__Actinobacteriota	c__Thermoleophilia	o__Gaiellales	f__Gaiellaceae	g__Gaiella
k__Bacteria	p__Elusimicrobiota	c__Elusimicrobia_984208	o__	f__	g__
k__Bacteria	p__Planctomycetota	c__Planctomycetia	o__Planctomycetales	f__	g__
k__Bacteria	p__Cyanobacteria	c__Vampirovibrionia	o__Obscuribacterales	f__Obscuribacteraceae	g__Obscuribacter
k__Bacteria	p__Proteobacteria	c__Alphaproteobacteria	o__Rhizobiales_A_504705	f__Xanthobacteraceae_503485	g__Pseudolabrys_502538
k__Bacteria	p__Proteobacteria	c__Alphaproteobacteria	o__Caulobacterales	f__Caulobacteraceae	g__Caulobacter_487856
k__Bacteria	p__Proteobacteria	c__Alphaproteobacteria	o__Rs-D84_512864	f__	g__
k__Bacteria	p__Armatimonadota	c__Fimbriimonadia	o__Fimbriimonadales	f__Fimbriimonadaceae	g__
k__Bacteria	p__Proteobacteria	c__Gammaproteobacteria	o__DSM-16500	f__DSM-16500	g__UBA4722
k__Bacteria	p__Proteobacteria	c__Gammaproteobacteria	o__Pseudomonadales_650611	f__Pseudomonadaceae	g__Pseudomonas_E_647464
k__Bacteria	p__Acidobacteriota	c__Acidobacteriae	o__Acidobacteriales	f__Acidobacteriaceae	g__Terracidiphilus_417246
k__Bacteria	p__CSP1-3	c__CSP1-3	o__CSP1-3	f__13-1-40CM-64-14	g__NP-4
k__Bacteria	p__Patescibacteria	c__Saccharimonadia	o__UBA4664	f__UBA4664	g__UBA4664
k__Bacteria	p__Bacteroidota	c__Bacteroidia	o__Chitinophagales	f__LD1	g__UBA7692
k__Bacteria	p__Planctomycetota	c__Planctomycetia	o__	f__	g__
k__Bacteria	p__Chlamydiota	c__Chlamydiia	o__Chlamydiales_778124	f__Parachlamydiaceae	g__Neochlamydia
k__Bacteria	p__Proteobacteria	c__Alphaproteobacteria	o__Rhodospirillales_505895	f__Magnetospirillaceae	g__
k__Bacteria	p__Proteobacteria	c__Alphaproteobacteria	o__Micropepsales	f__	g__
k__Bacteria	p__Planctomycetota	c__Planctomycetia	o__Gemmatales	f__Gemmataceae	g__Gemmata
k__Bacteria	p__Verrucomicrobiota	c__Verrucomicrobiae	o__Chthoniobacterales	f__UBA10450	g__AV80
k__Bacteria	p__Cyanobacteria	c__Vampirovibrionia	o__Obscuribacterales	f__Obscuribacteraceae	g__SBAT01
k__Bacteria	p__Proteobacteria	c__Alphaproteobacteria	o__Paracaedibacterales	f__Paracaedibacteraceae	g__
k__Bacteria	p__Spirochaetota	c__Spirochaetia	o__	f__	g__
k__Bacteria	p__Proteobacteria	c__Gammaproteobacteria	o__Burkholderiales_597439	f__Usitatibacteraceae	g__
k__Bacteria	p__Proteobacteria	c__Alphaproteobacteria	o__Micropepsales	f__Micropepsaceae	g__Rhizomicrobium
k__Bacteria	p__Bdellovibrionota_E	c__FAC87	o__UBA2466	f__UBA2466	g__
k__Bacteria	p__Proteobacteria	c__Alphaproteobacteria	o__Rhizobiales_A_504721	f__Hyphomicrobiaceae	g__Hyphomicrobium_A
k__Bacteria	p__Proteobacteria	c__Gammaproteobacteria	o__Berkiellales	f__Berkiellaceae	g__Berkiella_A
k__Bacteria	p__Proteobacteria	c__Gammaproteobacteria	o__Burkholderiales_592524	f__	g__
k__Bacteria	p__Verrucomicrobiota	c__Verrucomicrobiae	o__Chthoniobacterales	f__Chthoniobacteraceae	g__VFJQ01
k__Bacteria	p__Acidobacteriota	c__Acidobacteriae	o__2-12-FULL-54-10	f__2-12-FULL-54-10	g__SHUM01
k__Bacteria	p__Acidobacteriota	c__Acidobacteriae	o__Bryobacterales	f__Bryobacteraceae	g__Bog-375
k__Bacteria	p__Verrucomicrobiota	c__Verrucomicrobiae	o__Opitutales	f__Opitutaceae	g__ER46
k__Bacteria	p__Actinobacteriota	c__Actinomycetia	o__Actinomycetales	f__Microbacteriaceae	g__
k__Bacteria	p__Elusimicrobiota	c__Elusimicrobia_984208	o__UBA1565	f__UBA9628	g__GWA2-66-18
k__Bacteria	p__Actinobacteriota	c__Acidimicrobiia_401430	o__Acidimicrobiales	f__UBA8139	g__Rhabdothermincola
k__Bacteria	p__Planctomycetota	c__Planctomycetia	o__Pirellulales	f__Thermoguttaceae	g__
k__Bacteria	p__Bacteroidota	c__Bacteroidia	o__AKYH767	f__B-17BO	g__
k__Bacteria	p__Verrucomicrobiota	c__Verrucomicrobiae	o__Verrucomicrobiales	f__Verrucomicrobiaceae	g__
k__Bacteria	p__Patescibacteria	c__Saccharimonadia	o__Saccharimonadales	f__UBA4665	g__PMNU01
k__Bacteria	p__Actinobacteriota	c__Actinomycetia	o__Streptomycetales_400645	f__Streptomycetaceae_400641	g__
k__Bacteria	p__Myxococcota_A_473307	c__WYAZ01	o__WYAZ01	f__WYAZ01	g__WYAZ01
k__Bacteria	p__Proteobacteria	c__Alphaproteobacteria	o__ATCC43930_507931	f__Stellaceae_507931	g__Aliidongia
k__Bacteria	p__Proteobacteria	c__Alphaproteobacteria	o__Azospirillales_507929	f__Azospirillaceae_507917	g__Skermanella
k__Bacteria	p__Chlamydiota	c__Chlamydiia	o__Chlamydiales_778124	f__Parachlamydiaceae	g__
k__Bacteria	p__Planctomycetota	c__Planctomycetia	o__Pirellulales	f__Thermoguttaceae	g__Thermostilla
k__Bacteria	p__Acidobacteriota	c__Acidobacteriae	o__Acidobacteriales	f__Acidobacteriaceae	g__Granulicella_A_416614
k__Bacteria	p__Myxococcota_A_473307	c__Polyangia_463783	o__	f__	g__
k__Bacteria	p__Bacteroidota	c__Bacteroidia	o__AKYH767-A	f__2013-40CM-41-45	g__QQVM01
k__Bacteria	p__Myxococcota_A_473307	c__UBA4151	o__UBA4151	f__UBA4151	g__CACGMS01
k__Bacteria	p__Planctomycetota	c__Planctomycetia	o__Isosphaerales	f__Isosphaeraceae	g__Tundrisphaera
k__Bacteria	p__Proteobacteria	c__Gammaproteobacteria	o__Steroidobacterales	f__Steroidobacteraceae	g__Steroidobacter_A_608626
k__Bacteria	p__Bdellovibrionota_E	c__Bdellovibrionia_A_470743	o__UBA1018	f__UBA923	g__UBA923
k__Bacteria	p__Patescibacteria	c__Doudnabacteria	o__UBA920	f__UBA920	g__UBA920
k__Bacteria	p__Planctomycetota	c__Planctomycetia	o__Pirellulales	f__UBA1268	g__
k__Bacteria	p__Proteobacteria	c__Alphaproteobacteria	o__Dongiales	f__Dongiaceae	g__
k__Bacteria	p__Dependentiae	c__Babeliae	o__Babeliales	f__RVW-14	g__
k__Bacteria	p__Proteobacteria	c__Alphaproteobacteria	o__Rhodospirillales_505895	f__Magnetospirillaceae	g__Telmatospirillum
k__Bacteria	p__Proteobacteria	c__Alphaproteobacteria	o__Rhizobiales_A_502138	f__Devosiaceae	g__Devosia_A_501803
k__Bacteria	p__Myxococcota_A_473307	c__Myxococcia	o__Myxococcales	f__40CM-4-68-19	g__40CM-4-68-19
k__Bacteria	p__Actinobacteriota	c__Actinomycetia	o__Mycobacteriales	f__Jatrophihabitantaceae	g__
k__Bacteria	p__Bacteroidota	c__Bacteroidia	o__Chitinophagales	f__Chitinophagaceae_966727	g__Ferruginibacter
k__Bacteria	p__Eremiobacterota	c__Xenobia	o__RGZZ01	f__RGZZ01	g__RGZZ01
k__Bacteria	p__Patescibacteria	c__Paceibacteria	o__UBA9983_A	f__PALSA-1337	g__C7867-002
k__Bacteria	p__Patescibacteria	c__Paceibacteria	o__UBA9983_A	f__UBA2100	g__UBA10103
k__Bacteria	p__Proteobacteria	c__Alphaproteobacteria	o__Sphingomonadales	f__Sphingomonadaceae	g__
k__Bacteria	p__Armatimonadota	c__Fimbriimonadia	o__Fimbriimonadales	f__Fimbriimonadaceae	g__UBA2017
k__Bacteria	p__Planctomycetota	c__Planctomycetia	o__Planctomycetales	f__Planctomycetaceae	g__Schlesneria
k__Bacteria	p__Gemmatimonadota	c__Gemmatimonadetes	o__Gemmatimonadales	f__Gemmatimonadaceae	g__Gemmatimonas
k__Bacteria	p__Verrucomicrobiota	c__Verrucomicrobiae	o__Opitutales	f__CAG-312	g__
k__Bacteria	p__Bdellovibrionota_E	c__Bdellovibrionia_A_473294	o__Bdellovibrionales	f__Bdellovibrionaceae	g__
k__Bacteria	p__Myxococcota_A_473307	c__Myxococcia	o__Myxococcales	f__Vulgatibacteraceae	g__Vulgatibacter
k__Bacteria	p__Proteobacteria	c__Gammaproteobacteria	o__Burkholderiales_597432	f__Rhodocyclaceae	g__
k__Bacteria	p__Dependentiae	c__Babeliae	o__Babeliales	f__	g__
k__Bacteria	p__Proteobacteria	c__Gammaproteobacteria	o__Berkiellales	f__	g__
k__Bacteria	p__Bdellovibrionota_E	c__Bdellovibrionia_A_473294	o__Bdellovibrionales	f__Bdellovibrionaceae	g__Ga0074137
k__Bacteria	p__Acidobacteriota	c__Acidobacteriae	o__Acidobacteriales	f__Acidobacteriaceae	g__Granulicella_A_416163
k__Bacteria	p__Actinobacteriota	c__Actinomycetia	o__Streptomycetales_400645	f__Catenulisporaceae	g__Actinospica_394702
k__Bacteria	p__Cyanobacteria	c__Vampirovibrionia	o__Obscuribacterales	f__Obscuribacteraceae	g__PALSA-1081
k__Bacteria	p__Patescibacteria	c__Paceibacteria	o__UBA9983_A	f__UBA2103	g__C7867-001
k__Bacteria	p__Proteobacteria	c__Gammaproteobacteria	o__Diplorickettsiales	f__Diplorickettsiaceae	g__
k__Bacteria	p__Dependentiae	c__Babeliae	o__Babeliales	f__Babeliaceae	g__Babela
k__Bacteria	p__Proteobacteria	c__Alphaproteobacteria	o__Rhizobiales_A_504705	f__Labraceae	g__Labrys_504686
k__Bacteria	p__Proteobacteria	c__Gammaproteobacteria	o__Legionellales_A	f__Legionellaceae_A	g__
k__Bacteria	p__Bacteroidota	c__Bacteroidia	o__Chitinophagales	f__	g__
k__Bacteria	p__Myxococcota_A_437813	c__Polyangia_437813	o__Haliangiales_437813	f__Haliangiaceae_437813	g__
k__Bacteria	p__Proteobacteria	c__Alphaproteobacteria	o__Micavibrionales	f__UBA2020	g__UBA2020
k__Bacteria	p__Proteobacteria	c__Gammaproteobacteria	o__Xanthomonadales_613062	f__Rhodanobacteraceae_613062	g__Rhodanobacter_612715
k__Bacteria	p__Actinobacteriota	c__Actinomycetia	o__Nitriliruptorales	f__Nitriliruptoraceae	g__CSBr16-57R1
k__Bacteria	p__Dependentiae	c__Babeliae	o__Babeliales	f__RVW-14	g__CAIKAH01
k__Bacteria	p__Proteobacteria	c__Gammaproteobacteria	o__Nevskiales	f__Nevskiaceae	g__
k__Bacteria	p__Desulfobacterota_B	c__Binatia	o__HRBIN30	f__HRBIN30	g__HRBIN30
k__Bacteria	p__Bacteroidota	c__Bacteroidia	o__AKYH767	f__B-17BO	g__UBA2475
k__Bacteria	p__Firmicutes_D	c__Bacilli	o__Bacillales_B_310392	f__Bacillaceae_G_310392	g__Bacillus_A
k__Bacteria	p__Proteobacteria	c__Gammaproteobacteria	o__DSM-16500	f__DSM-16500	g__SCGC-AG-212-F23
k__Bacteria	p__Bdellovibrionota_E	c__Oligoflexia	o__Oligoflexales	f__Bin106	g__Bin106
k__Bacteria	p__Actinobacteriota	c__Acidimicrobiia_401430	o__Acidimicrobiales	f__Ilumatobacteraceae	g__
k__Bacteria	p__Bacteroidota	c__Kapabacteria	o__	f__	g__
k__Bacteria	p__Proteobacteria	c__Gammaproteobacteria	o__Pseudomonadales_650612	f__Porticoccaceae	g__SZUA-272
k__Bacteria	p__Firmicutes_D	c__Bacilli	o__Paenibacillales	f__Paenibacillaceae_367444	g__
Fungal phyllosphere
Kingdom	Phylum	Class	Order	Family	Genus
k__Fungi	p__	c__	o__	f__	g__
k__Fungi	p__Ascomycota	c__	o__	f__	g__
k__Fungi	p__Ascomycota	c__Eurotiomycetes	o__Chaetothyriales	f__Trichomeriaceae	g__Trichomerium
k__Fungi	p__Ascomycota	c__Eurotiomycetes	o__Chaetothyriales	f__	g__
k__Fungi	p__Basidiomycota	c__	o__	f__	g__
k__Fungi	p__Ascomycota	c__Eurotiomycetes	o__Chaetothyriales	f__Trichomeriaceae	g__Brycekendrickomyces
k__Fungi	p__Ascomycota	c__Dothideomycetes	o__	f__	g__
k__Fungi	p__Basidiomycota	c__Tremellomycetes	o__Tremellales	f__Trimorphomycetaceae	g__
k__Fungi	p__Ascomycota	c__Dothideomycetes	o__Capnodiales	f__	g__
k__Fungi	p__Ascomycota	c__Leotiomycetes	o__Helotiales	f__	g__
k__Fungi	p__Ascomycota	c__Orbiliomycetes	o__Orbiliales	f__	g__
k__Fungi	p__Ascomycota	c__Leotiomycetes	o__	f__	g__
k__Fungi	p__Ascomycota	c__Leotiomycetes	o__Helotiales	f__Helotiaceae	g__Zymochalara
k__Fungi	p__Ascomycota	c__Sordariomycetes	o__Hypocreales	f__Cordycipitaceae	g__Leptobacillium
k__Fungi	p__Ascomycota	c__Sordariomycetes	o__Diaporthales	f__Diaporthaceae	g__Diaporthe
k__Fungi	p__Ascomycota	c__Dothideomycetes	o__Pleosporales	f__Didymellaceae	g__Didymella
k__Fungi	p__Ascomycota	c__Eurotiomycetes	o__Chaetothyriales	f__Chaetothyriaceae	g__Ceramothyrium
k__Fungi	p__Ascomycota	c__Dothideomycetes	o__Capnodiales	f__Cladosporiaceae	g__Cladosporium
k__Fungi	p__Ascomycota	c__Taphrinomycetes	o__Taphrinales	f__Taphrinaceae	g__Taphrina
k__Fungi	p__Basidiomycota	c__Agaricomycetes	o__Polyporales	f__Polyporaceae	g__Erythromyces
k__Fungi	p__Ascomycota	c__Leotiomycetes	o__Helotiales	f__Bloxamiaceae	g__Bloxamia
k__Fungi	p__Ascomycota	c__Sordariomycetes	o__Glomerellales	f__Glomerellaceae	g__Colletotrichum
k__Fungi	p__Basidiomycota	c__Agaricostilbomycetes	o__Agaricostilbales	f__Ruineniaceae	g__Ruinenia
k__Fungi	p__Ascomycota	c__Sordariomycetes	o__Glomerellales	f__Plectosphaerellaceae	g__Plectosphaerella
k__Fungi	p__Ascomycota	c__Eurotiomycetes	o__Chaetothyriales	f__Chaetothyriaceae	g__Hermetothecium
k__Fungi	p__Ascomycota	c__Leotiomycetes	o__Helotiales	f__Helotiaceae	g__Tetracladium
k__Fungi	p__Ascomycota	c__Eurotiomycetes	o__Chaetothyriales	f__Herpotrichiellaceae	g__Pseudocladosporium
k__Fungi	p__Ascomycota	c__Dothideomycetes	o__Pleosporales	f__Phaeosphaeriaceae	g__Setophoma
k__Fungi	p__Ascomycota	c__Dothideomycetes	o__Pleosporales	f__Didymosphaeriaceae	g__
k__Fungi	p__Ascomycota	c__Lecanoromycetes	o__Lecanorales	f__Pilocarpaceae	g__Byssoloma
k__Fungi	p__Basidiomycota	c__Tremellomycetes	o__Filobasidiales	f__Piskurozymaceae	g__Piskurozyma
k__Fungi	p__Ascomycota	c__Eurotiomycetes	o__Chaetothyriales	f__Strelitzianaceae	g__Strelitziana
k__Fungi	p__Ascomycota	c__Sordariomycetes	o__Xylariales	f__Amphisphaeriaceae	g__Microdochium
k__Fungi	p__Ascomycota	c__Dothideomycetes	o__Pleosporales	f__Didymellaceae	g__
k__Fungi	p__Ascomycota	c__Sordariomycetes	o__Hypocreales	f__Stachybotryaceae	g__Myxospora
k__Fungi	p__Ascomycota	c__Dothideomycetes	o__Mycosphaerellales	f__Mycosphaerellaceae	g__Pseudocercospora
k__Fungi	p__Basidiomycota	c__Agaricomycetes	o__	f__	g__
k__Fungi	p__Ascomycota	c__Eurotiomycetes	o__Chaetothyriales	f__Chaetothyriaceae	g__Aphanophora
k__Fungi	p__Ascomycota	c__Leotiomycetes	o__Helotiales	f__Dermateaceae	g__Coleophoma
k__Fungi	p__Ascomycota	c__Sordariomycetes	o__Hypocreales	f__	g__
k__Fungi	p__Ascomycota	c__Sordariomycetes	o__Xylariales	f__	g__
k__Fungi	p__Ascomycota	c__Dothideomycetes	o__Capnodiales	f__Xenodevriesiaceae	g__Xenodevriesia
k__Fungi	p__Ascomycota	c__Sordariomycetes	o__	f__	g__
k__Fungi	p__Basidiomycota	c__Agaricomycetes	o__Polyporales	f__	g__
k__Fungi	p__Basidiomycota	c__Agaricomycetes	o__Trechisporales	f__	g__
k__Fungi	p__Ascomycota	c__Leotiomycetes	o__Helotiales	f__Helotiaceae	g__Pseudohelotium
k__Fungi	p__Ascomycota	c__Dothideomycetes	o__Mycosphaerellales	f__Mycosphaerellaceae	g__
k__Fungi	p__Ascomycota	c__Dothideomycetes	o__Mycosphaerellales	f__	g__
k__Fungi	p__Basidiomycota	c__Agaricomycetes	o__Cantharellales	f__	g__
k__Fungi	p__Basidiomycota	c__Agaricomycetes	o__Cantharellales	f__Botryobasidiaceae	g__Botryobasidium
k__Fungi	p__Basidiomycota	c__Tremellomycetes	o__Filobasidiales	f__Filobasidiaceae	g__Filobasidium
k__Fungi	p__Ascomycota	c__Dothideomycetes	o__Pleosporales	f__Periconiaceae	g__Periconia
k__Fungi	p__Ascomycota	c__Eurotiomycetes	o__Chaetothyriales	f__Herpotrichiellaceae	g__Cladophialophora
k__Fungi	p__Ascomycota	c__Sordariomycetes	o__Chaetosphaeriales	f__Chaetosphaeriaceae	g__Verhulstia
k__Fungi	p__Ascomycota	c__Leotiomycetes	o__Helotiales	f__Hyaloscyphaceae	g__Calycina
k__Fungi	p__Ascomycota	c__Dothideomycetes	o__Mycosphaerellales	f__Mycosphaerellaceae	g__Xenomycosphaerella
k__Fungi	p__Ascomycota	c__Orbiliomycetes	o__Orbiliales	f__Orbiliaceae	g__
k__Fungi	p__Ascomycota	c__Eurotiomycetes	o__Chaetothyriales	f__Cyphellophoraceae	g__Cyphellophora
k__Fungi	p__Basidiomycota	c__Tremellomycetes	o__Tremellales	f__Rhynchogastremataceae	g__Papiliotrema
k__Fungi	p__Basidiomycota	c__Agaricomycetes	o__Polyporales	f__Ganodermataceae	g__Ganoderma
k__Fungi	p__Ascomycota	c__Dothideomycetes	o__Pleosporales	f__	g__
k__Fungi	p__Ascomycota	c__Lecanoromycetes	o__Lecanorales	f__Pilocarpaceae	g__Fellhanera
k__Fungi	p__Basidiomycota	c__Microbotryomycetes	o__	f__Chrysozymaceae	g__Bannozyma
k__Fungi	p__Ascomycota	c__Sordariomycetes	o__Xylariales	f__	g__Subulispora
k__Fungi	p__Ascomycota	c__Lecanoromycetes	o__Ostropales	f__Stictidaceae	g__Cyanodermella
k__Fungi	p__Ascomycota	c__Sordariomycetes	o__Chaetosphaeriales	f__Chaetosphaeriaceae	g__Pseudodinemasporium
k__Fungi	p__Ascomycota	c__Dothideomycetes	o__Pleosporales	f__Neopyrenochaetaceae	g__Neopyrenochaeta
k__Fungi	p__Ascomycota	c__Eurotiomycetes	o__Chaetothyriales	f__Herpotrichiellaceae	g__Exophiala
k__Fungi	p__Basidiomycota	c__Microbotryomycetes	o__Kriegeriales	f__Kriegeriaceae	g__Libkindia
k__Fungi	p__Ascomycota	c__Dothideomycetes	o__Pleosporales	f__Didymosphaeriaceae	g__Paraphaeosphaeria
k__Fungi	p__Basidiomycota	c__Agaricomycetes	o__Cantharellales	f__Ceratobasidiaceae	g__
k__Fungi	p__Ascomycota	c__Orbiliomycetes	o__Orbiliales	f__Orbiliaceae	g__Retiarius
k__Fungi	p__Ascomycota	c__Arthoniomycetes	o__Arthoniales	f__Roccellaceae	g__Gyrographa
k__Fungi	p__Basidiomycota	c__Agaricomycetes	o__Trechisporales	f__	g__Sistotremastrum
k__Fungi	p__Ascomycota	c__Dothideomycetes	o__Mycosphaerellales	f__Mycosphaerellaceae	g__Acrodontium
k__Fungi	p__Ascomycota	c__Dothideomycetes	o__Tubeufiales	f__Tubeufiaceae	g__Uredinophila
k__Fungi	p__Ascomycota	c__Arthoniomycetes	o__Lichenostigmatales	f__Phaeococcomycetaceae	g__Phaeococcomyces
k__Fungi	p__Basidiomycota	c__Malasseziomycetes	o__Malasseziales	f__Malasseziaceae	g__Malassezia
k__Fungi	p__Ascomycota	c__Dothideomycetes	o__Dothideales	f__Saccotheciaceae	g__Selenophoma
k__Fungi	p__Ascomycota	c__Leotiomycetes	o__Helotiales	f__Hyaloscyphaceae	g__Polydesmia
k__Fungi	p__Ascomycota	c__Sordariomycetes	o__Xylariales	f__Castanediellaceae	g__Castanediella
k__Fungi	p__Basidiomycota	c__Agaricomycetes	o__Hymenochaetales	f__Rickenellaceae	g__Resinicium
k__Fungi	p__Ascomycota	c__Leotiomycetes	o__Helotiales	f__Chaetomellaceae	g__Pilidium
k__Fungi	p__Ascomycota	c__Sordariomycetes	o__Amphisphaeriales	f__Pestalotiopsidaceae	g__Pestalotiopsis
k__Fungi	p__Ascomycota	c__Sordariomycetes	o__Chaetosphaeriales	f__Chaetosphaeriaceae	g__
k__Fungi	p__Ascomycota	c__Sordariomycetes	o__Hypocreales	f__Cordycipitaceae	g__Cordyceps
k__Fungi	p__Ascomycota	c__Sordariomycetes	o__Hypocreales	f__Hypocreaceae	g__Trichoderma
k__Fungi	p__Ascomycota	c__Dothideomycetes	o__Pleosporales	f__Teichosporaceae	g__Teichospora
k__Fungi	p__Ascomycota	c__Sordariomycetes	o__Glomerellales	f__Australiascaceae	g__Australiasca
k__Fungi	p__Ascomycota	c__Dothideomycetes	o__Botryosphaeriales	f__Phyllostictaceae	g__Phyllosticta
k__Fungi	p__Ascomycota	c__Sordariomycetes	o__Hypocreales	f__Nectriaceae	g__Ilyonectria
k__Fungi	p__Ascomycota	c__Leotiomycetes	o__Helotiales	f__Helotiaceae	g__Hymenoscyphus
k__Fungi	p__Ascomycota	c__Sordariomycetes	o__Trichosphaeriales	f__Trichosphaeriaceae	g__Nigrospora
k__Fungi	p__Ascomycota	c__Sordariomycetes	o__Xylariales	f__Amphisphaeriaceae	g__Amphisphaeria
k__Fungi	p__Basidiomycota	c__Microbotryomycetes	o__	f__Chrysozymaceae	g__Oberwinklerozyma
k__Fungi	p__Ascomycota	c__Eurotiomycetes	o__Chaetothyriales	f__Chaetothyriaceae	g__Kazulia
k__Fungi	p__Ascomycota	c__Sordariomycetes	o__Hypocreales	f__Ophiocordycipitaceae	g__Tolypocladium
k__Fungi	p__Basidiomycota	c__Exobasidiomycetes	o__Exobasidiales	f__Exobasidiaceae	g__Exobasidium
k__Fungi	p__Ascomycota	c__Dothideomycetes	o__Capnodiales	f__	g__Microcyclospora
k__Fungi	p__Ascomycota	c__Sordariomycetes	o__Chaetosphaeriales	f__Chaetosphaeriaceae	g__Dictyochaeta
k__Fungi	p__Ascomycota	c__Eurotiomycetes	o__Chaetothyriales	f__Herpotrichiellaceae	g__
k__Fungi	p__Ascomycota	c__Dothideomycetes	o__Pleosporales	f__	g__Ochrocladosporium
k__Fungi	p__Ascomycota	c__Dothideomycetes	o__Pleosporales	f__Pleosporaceae	g__Alternaria
k__Fungi	p__Ascomycota	c__Sordariomycetes	o__Chaetosphaeriales	f__Chaetosphaeriaceae	g__Chaetosphaeria
k__Fungi	p__Ascomycota	c__Sordariomycetes	o__Diaporthales	f__	g__
k__Fungi	p__Ascomycota	c__Sordariomycetes	o__Xylariales	f__Amphisphaeriaceae	g__
k__Fungi	p__Ascomycota	c__Saccharomycetes	o__Saccharomycetales	f__Debaryomycetaceae	g__Meyerozyma
k__Fungi	p__Basidiomycota	c__Agaricomycetes	o__Hymenochaetales	f__Hymenochaetaceae	g__Hymenochaete
k__Fungi	p__Basidiomycota	c__Agaricomycetes	o__Polyporales	f__Polyporaceae	g__Porogramme
k__Fungi	p__Basidiomycota	c__Cystobasidiomycetes	o__Erythrobasidiales	f__Erythrobasidiaceae	g__Erythrobasidium
k__Fungi	p__Basidiomycota	c__Agaricomycetes	o__Auriculariales	f__	g__
k__Fungi	p__Ascomycota	c__Sordariomycetes	o__Xylariales	f__Xylariaceae	g__Xylaria
k__Fungi	p__Ascomycota	c__Saccharomycetes	o__Saccharomycetales	f__	g__Candida
k__Fungi	p__Mortierellomycota	c__Mortierellomycetes	o__Mortierellales	f__Mortierellaceae	g__Mortierella
k__Fungi	p__Ascomycota	c__Eurotiomycetes	o__Eurotiales	f__Aspergillaceae	g__Penicillium
k__Fungi	p__Ascomycota	c__Dothideomycetes	o__Capnodiales	f__Cladosporiaceae	g__Rachicladosporium
k__Fungi	p__Basidiomycota	c__Microbotryomycetes	o__Sporidiobolales	f__Sporidiobolaceae	g__Rhodotorula
k__Fungi	p__Ascomycota	c__Sordariomycetes	o__Xylariales	f__	g__Libertella
k__Fungi	p__Ascomycota	c__Dothideomycetes	o__Capnodiales	f__	g__Pseudoramichloridium
k__Fungi	p__Basidiomycota	c__Agaricomycetes	o__Russulales	f__Stereaceae	g__Stereum
k__Fungi	p__Ascomycota	c__Dothideomycetes	o__Dothideales	f__Saccotheciaceae	g__
k__Fungi	p__Ascomycota	c__Dothideomycetes	o__	f__	g__Peltaster
k__Fungi	p__Ascomycota	c__Sordariomycetes	o__Hypocreales	f__Clavicipitaceae	g__Metapochonia
k__Fungi	p__Ascomycota	c__Dothideomycetes	o__Venturiales	f__Venturiaceae	g__Sympodiella
k__Fungi	p__Basidiomycota	c__Agaricomycetes	o__Agaricales	f__Mycenaceae	g__Mycena
k__Fungi	p__Ascomycota	c__Leotiomycetes	o__Helotiales	f__Hyaloscyphaceae	g__Hyaloscypha
k__Fungi	p__Basidiomycota	c__Cystobasidiomycetes	o__	f__Symmetrosporaceae	g__Symmetrospora
k__Fungi	p__Basidiomycota	c__Cystobasidiomycetes	o__	f__	g__
k__Fungi	p__Ascomycota	c__Sordariomycetes	o__Hypocreales	f__Clavicipitaceae	g__Aschersonia
Fungal rhizosphere
Kingdom	Phylum	Class	Order	Family	Genus
k__Fungi	p__	c__	o__	f__	g__
k__Fungi	p__Ascomycota	c__Archaeorhizomycetes	o__Archaeorhizomycetales	f__Archaeorhizomycetaceae	g__Archaeorhizomyces
k__Fungi	p__Ascomycota	c__Archaeorhizomycetes	o__Archaeorhizomycetales	f__	g__
k__Fungi	p__Ascomycota	c__	o__	f__	g__
k__Fungi	p__Ascomycota	c__Leotiomycetes	o__Helotiales	f__	g__
k__Fungi	p__Mortierellomycota	c__Mortierellomycetes	o__Mortierellales	f__Mortierellaceae	g__Mortierella
k__Fungi	p__Basidiomycota	c__	o__	f__	g__
k__Fungi	p__Rozellomycota	c__	o__	f__	g__
k__Fungi	p__Ascomycota	c__Leotiomycetes	o__	f__	g__
k__Fungi	p__Basidiomycota	c__Agaricomycetes	o__	f__	g__
k__Fungi	p__Mortierellomycota	c__Mortierellomycetes	o__Mortierellales	f__Mortierellaceae	g__Podila
k__Fungi	p__Mortierellomycota	c__Mortierellomycetes	o__Mortierellales	f__Mortierellaceae	g__
k__Fungi	p__Ascomycota	c__Sordariomycetes	o__Sordariales	f__Chaetomiaceae	g__Humicola
k__Fungi	p__Ascomycota	c__Sordariomycetes	o__Hypocreales	f__Hypocreaceae	g__Trichoderma
k__Fungi	p__Ascomycota	c__Sordariomycetes	o__Hypocreales	f__Nectriaceae	g__Ilyonectria
k__Fungi	p__Basidiomycota	c__Tremellomycetes	o__Tremellales	f__Trimorphomycetaceae	g__Saitozyma
k__Fungi	p__Ascomycota	c__Sordariomycetes	o__	f__	g__
k__Fungi	p__Basidiomycota	c__Agaricomycetes	o__Polyporales	f__Ganodermataceae	g__Ganoderma
k__Fungi	p__Ascomycota	c__Leotiomycetes	o__Helotiales	f__Hyaloscyphaceae	g__Hyaloscypha
k__Fungi	p__Ascomycota	c__Sordariomycetes	o__Hypocreales	f__Clavicipitaceae	g__Pochonia
k__Fungi	p__Ascomycota	c__Sordariomycetes	o__Hypocreales	f__Ophiocordycipitaceae	g__Tolypocladium
k__Fungi	p__Ascomycota	c__Eurotiomycetes	o__Chaetothyriales	f__Herpotrichiellaceae	g__
k__Fungi	p__Basidiomycota	c__Agaricomycetes	o__Agaricales	f__	g__
k__Fungi	p__Ascomycota	c__Sordariomycetes	o__Sordariales	f__Cephalothecaceae	g__Cephalotheca
k__Fungi	p__Basidiomycota	c__Agaricomycetes	o__Sebacinales	f__Serendipitaceae	g__Serendipita
k__Fungi	p__Ascomycota	c__Leotiomycetes	o__Helotiales	f__Hyaloscyphaceae	g__
k__Fungi	p__Ascomycota	c__Sordariomycetes	o__Hypocreales	f__Clavicipitaceae	g__Keithomyces
k__Fungi	p__Basidiomycota	c__Agaricomycetes	o__Auriculariales	f__Hyaloriaceae	g__
k__Fungi	p__Ascomycota	c__Sordariomycetes	o__Chaetosphaeriales	f__Chaetosphaeriaceae	g__
k__Fungi	p__Ascomycota	c__Sordariomycetes	o__Chaetosphaeriales	f__Chaetosphaeriaceae	g__Chaetosphaeria
k__Fungi	p__Ascomycota	c__Eurotiomycetes	o__Chaetothyriales	f__Herpotrichiellaceae	g__Cladophialophora
k__Fungi	p__Basidiomycota	c__Tremellomycetes	o__Trichosporonales	f__Trichosporonaceae	g__Apiotrichum
k__Fungi	p__Ascomycota	c__Orbiliomycetes	o__Orbiliales	f__	g__
k__Fungi	p__Ascomycota	c__Dothideomycetes	o__	f__	g__
k__Fungi	p__Ascomycota	c__Leotiomycetes	o__Helotiales	f__Leotiaceae	g__Gorgomyces
k__Fungi	p__Ascomycota	c__Sordariomycetes	o__Chaetosphaeriales	f__Chaetosphaeriaceae	g__Chloridium
k__Fungi	p__Ascomycota	c__Sordariomycetes	o__Sordariales	f__	g__Dendrosporium
k__Fungi	p__Ascomycota	c__Sordariomycetes	o__Hypocreales	f__Bionectriaceae	g__Clonostachys
k__Fungi	p__Ascomycota	c__Eurotiomycetes	o__Chaetothyriales	f__	g__
k__Fungi	p__Ascomycota	c__Sordariomycetes	o__Hypocreales	f__Clavicipitaceae	g__Metapochonia
k__Fungi	p__Basidiomycota	c__Agaricomycetes	o__Trechisporales	f__	g__
k__Fungi	p__Ascomycota	c__Dothideomycetes	o__Capnodiales	f__	g__
k__Fungi	p__Mortierellomycota	c__Mortierellomycetes	o__Mortierellales	f__Mortierellaceae	g__Linnemannia
k__Fungi	p__Ascomycota	c__Sordariomycetes	o__Hypocreales	f__Nectriaceae	g__
k__Fungi	p__Ascomycota	c__Leotiomycetes	o__Helotiales	f__Tympanidaceae	g__
k__Fungi	p__Ascomycota	c__Leotiomycetes	o__Helotiales	f__Helotiaceae	g__Pseudoclathrosphaerina
k__Fungi	p__Glomeromycota	c__	o__	f__	g__
k__Fungi	p__Ascomycota	c__Sordariomycetes	o__Hypocreales	f__	g__
k__Fungi	p__Ascomycota	c__Sordariomycetes	o__Hypocreales	f__Clavicipitaceae	g__
k__Fungi	p__Ascomycota	c__Sordariomycetes	o__Hypocreales	f__Nectriaceae	g__Fusarium
k__Fungi	p__Ascomycota	c__Leotiomycetes	o__Helotiales	f__Hyaloscyphaceae	g__Lachnellula
k__Fungi	p__Ascomycota	c__Sordariomycetes	o__Xylariales	f__	g__
k__Fungi	p__Ascomycota	c__Eurotiomycetes	o__Eurotiales	f__Aspergillaceae	g__Penicillium
k__Fungi	p__Ascomycota	c__Sordariomycetes	o__Ophiostomatales	f__Ophiostomataceae	g__Sporothrix
k__Fungi	p__Basidiomycota	c__Agaricomycetes	o__Agaricales	f__Lyophyllaceae	g__Lyophyllum
k__Fungi	p__Ascomycota	c__Sordariomycetes	o__Xylariales	f__Xylariaceae	g__Xylaria
k__Fungi	p__Basidiomycota	c__Agaricomycetes	o__Agaricales	f__Entolomataceae	g__Entoloma
k__Fungi	p__Basidiobolomycota	c__Basidiobolomycetes	o__Basidiobolales	f__Basidiobolaceae	g__Basidiobolus
k__Fungi	p__Basidiomycota	c__Agaricomycetes	o__Trechisporales	f__Hydnodontaceae	g__Trechispora
k__Fungi	p__Ascomycota	c__Sordariomycetes	o__Hypocreales	f__Clavicipitaceae	g__Metarhizium
k__Fungi	p__Basidiomycota	c__Agaricomycetes	o__Agaricales	f__Strophariaceae	g__Galerina
k__Fungi	p__Basidiomycota	c__Microbotryomycetes	o__	f__	g__
k__Fungi	p__Ascomycota	c__Eurotiomycetes	o__Chaetothyriales	f__Herpotrichiellaceae	g__Exophiala
k__Fungi	p__Ascomycota	c__Sordariomycetes	o__Hypocreales	f__Nectriaceae	g__Cylindrocladiella
k__Fungi	p__Ascomycota	c__Dothideomycetes	o__Capnodiales	f__Cladosporiaceae	g__Cladosporium
k__Fungi	p__Ascomycota	c__Sordariomycetes	o__Hypocreales	f__Nectriaceae	g__Thelonectria
k__Fungi	p__Ascomycota	c__Leotiomycetes	o__Helotiales	f__Dermateaceae	g__Pezicula
k__Fungi	p__Ascomycota	c__Sordariomycetes	o__Hypocreales	f__Nectriaceae	g__Mariannaea
k__Fungi	p__Basidiomycota	c__Microbotryomycetes	o__Microbotryales	f__	g__
k__Fungi	p__Ascomycota	c__Leotiomycetes	o__Helotiales	f__Arachnopezizaceae	g__
k__Fungi	p__Mortierellomycota	c__Mortierellomycetes	o__Mortierellales	f__Mortierellaceae	g__Dissophora
k__Fungi	p__Ascomycota	c__Sordariomycetes	o__Hypocreales	f__Ophiocordycipitaceae	g__
k__Fungi	p__Ascomycota	c__Leotiomycetes	o__Helotiales	f__Myxotrichaceae	g__Oidiodendron
k__Fungi	p__Ascomycota	c__Dothideomycetes	o__Venturiales	f__Venturiaceae	g__Sympodiella
k__Fungi	p__Basidiomycota	c__Agaricomycetes	o__Agaricales	f__Agaricaceae	g__
k__Fungi	p__Basidiomycota	c__Agaricomycetes	o__Agaricales	f__Cortinariaceae	g__Cortinarius
k__Fungi	p__Ascomycota	c__Sordariomycetes	o__Hypocreales	f__Cordycipitaceae	g__Beauveria
k__Fungi	p__Ascomycota	c__Sordariomycetes	o__Hypocreales	f__Nectriaceae	g__Volutella
k__Fungi	p__Chytridiomycota	c__	o__	f__	g__
k__Fungi	p__Mucoromycota	c__Endogonomycetes	o__	f__	g__
k__Fungi	p__Ascomycota	c__Sordariomycetes	o__Hypocreales	f__Cordycipitaceae	g__Leptobacillium
k__Fungi	p__Glomeromycota	c__Archaeosporomycetes	o__Archaeosporales	f__	g__
k__Fungi	p__Ascomycota	c__Sordariomycetes	o__Xylariales	f__Graphostromataceae	g__Biscogniauxia
k__Fungi	p__Ascomycota	c__Sordariomycetes	o__Amphisphaeriales	f__Pestalotiopsidaceae	g__Pestalotiopsis
k__Fungi	p__Basidiomycota	c__Agaricomycetes	o__Trechisporales	f__Hydnodontaceae	g__
k__Fungi	p__Ascomycota	c__Sordariomycetes	o__Xylariales	f__Xylariaceae	g__
k__Fungi	p__Ascomycota	c__Sordariomycetes	o__Xylariales	f__Microdochiaceae	g__Idriella
k__Fungi	p__Basidiomycota	c__Tremellomycetes	o__Cystofilobasidiales	f__Mrakiaceae	g__Tausonia
k__Fungi	p__Ascomycota	c__Sordariomycetes	o__Atractosporales	f__Atractosporaceae	g__
k__Fungi	p__Basidiomycota	c__Agaricomycetes	o__Geastrales	f__	g__
k__Fungi	p__Ascomycota	c__Sordariomycetes	o__Sordariales	f__Helminthosphaeriaceae	g__Spadicoides
k__Fungi	p__Ascomycota	c__Dothideomycetes	o__Capnodiales	f__Xenodevriesiaceae	g__Xenodevriesia
k__Fungi	p__Basidiomycota	c__Agaricomycetes	o__Agaricales	f__Lycoperdaceae	g__Morganella
k__Fungi	p__Ascomycota	c__Sordariomycetes	o__Xylariales	f__	g__Subulispora
k__Fungi	p__Ascomycota	c__Dothideomycetes	o__Tubeufiales	f__Tubeufiaceae	g__
k__Fungi	p__Ascomycota	c__Sordariomycetes	o__Hypocreales	f__Cordycipitaceae	g__
k__Fungi	p__Ascomycota	c__Sordariomycetes	o__Hypocreales	f__Hypocreaceae	g__Sphaerostilbella
k__Fungi	p__Basidiomycota	c__Agaricomycetes	o__Agaricales	f__Psathyrellaceae	g__Coprinellus
k__Fungi	p__Ascomycota	c__Leotiomycetes	o__Helotiales	f__Helotiaceae	g__Scytalidium
k__Fungi	p__Ascomycota	c__Sordariomycetes	o__Phomatosporales	f__Phomatosporaceae	g__Phomatospora
k__Fungi	p__Ascomycota	c__Dothideomycetes	o__Pleosporales	f__Didymosphaeriaceae	g__
k__Fungi	p__Ascomycota	c__Sordariomycetes	o__Trichosphaeriales	f__Trichosphaeriaceae	g__Nigrospora
k__Fungi	p__Ascomycota	c__Sordariomycetes	o__Hypocreales	f__Cordycipitaceae	g__Cordyceps
k__Fungi	p__Basidiomycota	c__Agaricomycetes	o__Agaricales	f__Psathyrellaceae	g__Psathyrella
k__Fungi	p__Ascomycota	c__Sordariomycetes	o__Hypocreales	f__Nectriaceae	g__Viridispora
k__Fungi	p__Ascomycota	c__Dothideomycetes	o__Mycosphaerellales	f__Mycosphaerellaceae	g__Pseudocercospora
k__Fungi	p__Ascomycota	c__Sordariomycetes	o__Conioscyphales	f__Conioscyphaceae	g__Conioscypha
k__Fungi	p__Ascomycota	c__Dothideomycetes	o__Pleosporales	f__Amorosiaceae	g__Amorocoelophoma
k__Fungi	p__Rozellomycota	c__	o__GS04	f__	g__
k__Fungi	p__Ascomycota	c__Sordariomycetes	o__Hypocreales	f__	g__Acremonium
k__Fungi	p__Ascomycota	c__Leotiomycetes	o__Helotiales	f__Gelatinodiscaceae	g__Neobulgaria
k__Fungi	p__Basidiomycota	c__Agaricomycetes	o__Hymenochaetales	f__Schizoporaceae	g__Rogersella
k__Fungi	p__Ascomycota	c__Dothideomycetes	o__Pleosporales	f__Didymosphaeriaceae	g__Pseudodidymocyrtis
k__Fungi	p__Chytridiomycota	c__Rhizophydiomycetes	o__Rhizophydiales	f__	g__
