# Supplementary material for: Changes in the phyllosphere and rhizosphere of a cloud forest tree fern along an elevation gradient
Source: Research Square preprint supplement (doi:10.21203/rs.3.rs-5374836/v1), 2024-11-15
Supplement: Supplementary file 2 [file 1c0aa183ba6a4f40871126b4.xlsx]

## Sheet: Data
ID_sample	ID_individual	Sample_type	Plot	Transect	Coordinates_N	Coordinates_W	Elevation	Individual	Steriles	Fertiles	Immature_sorus	Mature_sorus	Circinios	Height	C_base	C_medio	C_apex	Length_hojaNS	Length_OE	T_tot	T_jul	Light_tot	Light_jul	RH_tot	RH_jul	pH	EC	MO	N	Ctotal	Ptotal	P	K	Ca	Mg	Na	CIC	NO3	NH4	Fe	Reads	Shannon
HS1	Sin_individuo	Soil	1	30	17.5882	96.3997	2210													13.41	13.69	1033.87	540.18	88.46	98.33	3.5	0.0795845	15.9848	0.443752	19.47	0.0306051	9.71429	0.393862	0.50499	0.589136	0.184696	33.1287	29.394	65.9574	260.5	111256	4.28674
HF1A	1A	Phyllosphere	1	30	17.5882	96.3997	2210	3	4	0	0	0	1	41	40		41	247	254	13.42	13.72	1004.35	467.95	88.46	98.33	3.7	0.0568461	5.44162	0.207174	4.802	0.0164797	7.14286	0.275652	0.179641	0.239177	0.0952174	16.1347	32.2618	35.1295	49	94928	5.54366
HF1B	1B	Phyllosphere	1	30	17.5882	96.3997	2210	7	6	0	0	0	2	60	62		65	286	287	13.62	13.76	1597.78	863.34	88.46	98.33	3.8	0.108008	**	0.284028	41.22	0.0729814	38.5714	1.50721	3.45309	4.36543	0.219391	109.983	26.5263	295.374	116.07	79587	5.30119
HF1C	1C	Phyllosphere	1	30	17.5882	96.3997	2210	11	2	3	0	3	3	390	41	27	41	214	270	13.19	13.59	499.47	289.25	88.46	98.33	3.4	0.1478	13.6041	0.328136	7.838	0.0141254	12.8571	0.641944	0.630739	0.445761	0.0695652	23.7725	46.6003	48.0342	95.2	71424	5.70796
HS2	Sin_individuo	Soil	2	30	17.5882	96.3997	1978													13.59	14.42	290.44	342.65	94.35	99.18	3.6	0.136431	9.52284	0.341502	7.529	0.089461	15.7143	0.254373	0.666667	0.477695	0.0773043	14.7981	109.69	25.0925	431.3	80784	5.04015
HF2A	2A	Phyllosphere	2	30	17.5906	96.3982	1978	29	8	0	0	0	2	260	41	51	55	327	305	13.54	14.46	237.3	364.72	94.35	99.18	4.4	0.0682153	8.16244	0.366229	5.361	0.0729814	11.1429	0.329412	2.21856	0.584856	0.104174	21.2902	64.5235	19.3571	347.4	108516	5.33989
HF2B	2B	Phyllosphere	2	30	17.5906	96.3982	1978	28	4	0	0	0	4	153	50		49	246	303	13.54	14.46	237.3	364.72	94.35	99.18	4	0.0454769	6.25787	0.274004	4.226	0.0776898	17.1429	0.177749	0.58483	0.302058	0.00495652	18.426	39.431	19.3571	291	74032	5.75194
HF2C	2C	Phyllosphere	2	30	17.5906	96.3982	1978	26	3	0	0	0	4	70	36		44	326	318	13.68	14.35	396.71	298.5	94.35	99.18	3.8	0.0682153	11.2234	0.424372	5.94	0.0965237	11.7143	0.368389	0.586826	0.360658	0.0553043	25.3	85.3144	25.0925	319.8	65387	5.44403
HS3	Sin_individuo	Soil	3	35	17.5903	96.4008	2178													13.09	13.92	760.74	1213.37	89.04	99.11	3.6	0.0682153	29.03	0.84206	21.28	0.0588559	10	0.6	1.51198	0.861399	0.2	45.1	52	63	406.2	85053	5.04911
HF3A	3A	Phyllosphere	3	35	17.5903	96.4008	2178	33	8	0	0	0	2	186	57	51	59	230	200	13.2	14.03	1126.18	2249.09	89.04	99.11	3.5	0.113692	20.1015	0.711742	10.18	0.0376678	7.71429	0.275448	2.04691	0.668807	0.074087	47.2585	94.6345	28.6771	518.4	52227	5.15423
HF3B	3B	Phyllosphere	3	35	17.5903	96.4008	2178	38	2	2	2	0	2	28	42		47	216	228	13.23	14.13	776.39	1030.44	89.04	99.11	3.3	0.0568461	9.52284	0.912232	8.306	0.0188339	8.28571	0.383632	0.618762	0.38963	0.108609	25.5864	30.8279	29.394	442.9	44058	4.72193
HF3C	3C	Phyllosphere	3	35	17.5903	96.4008	2178	45	0	1	0	1	9	185	55	60	63	315		12.84	13.59	379.65	360.59	89.04	99.11	3.8	0.0454769	7.00508	0.217198	4.476	0.0470847	4.85714	0.19734	0.691617	0.360165	0.0293043	20.0491	57.3542	25.8094	291.7	37385	5.79332
HS4	Sin_individuo	Soil	4	35	17.5903	96.4008	2007													13.36	14.41	374.47	1009.3	95.94	98.88	3.9	0.0341076	14.9645	0.59412	9.14	0.098878	4.57143	0.293453	0.202595	0.35144	-0.00608696	27.0185	101.804	37.2802	362.7	50374	3.10207
HF4A	4A	Phyllosphere	4	35	17.5906	96.3993	2007	46	5	0	0	0	3	158	44		51	275	250	13.53	14.47	539.65	1817.05	95.94	98.88	3.7	0.0795845	10.6599	0.23992	7.72	0.0706271	11.4286	0.313657	0.897206	0.487243	0.0411304	24.6317	73.8436	27.9602	392.7	52563	5.16557
HF4B	4B	Phyllosphere	4	35	17.5906	96.3993	2007	51	3	0	0	0	0	21	30		35	195	186	13.24	14.25	188.46	179.42	95.94	98.88	3.3	0.0909537	30.7614	0.444421	22.75	0.0800441	27.1429	0.70046	0.97505	1.01185	0.202522	53.6551	72.4097	142.669	493.65	74772	4.78767
HF4C	4C	Phyllosphere	4	35	17.5906	96.3993	2007	55	3	0	0	0	4	205	36	42	56	253	252	13.32	14.5	395.29	1031.41	95.94	98.88	3.7	0.0397923	29.5431	0.600803	19.74	0.12242	20.8571	0.69422	2.65669	1.18914	0.0949565	42.1985	66.6743	50.9019	540	33217	5.82824
HS5	Sin_individuo	Soil	5	35	17.5903	96.4008	2018													13.25	14.1	455.62	640.69	92.97	99.32	3.6	0.0454769	26.1878	0.683673	15.23	0.0753356	18	0.526445	2.52994	1.73564	0.0178261	50.6	81.0128	51.6188	439.65	86350	4.8002
HF5A	5A	Phyllosphere	5	35	17.5908	96.3997	2018	62	3	0	0	0	3	37	32		40	276	298	13.11	13.94	375.27	297.75	92.97	99.32	3.4	0.0682153	31.3706	0.846739	21.93	0.0729814	16	0.482097	3.01896	1.01498	0.100261	91.6528	100.37	80.2959	345.15	50037	4.82607
HF5B	5B	Phyllosphere	5	35	17.5908	96.3997	2018	73	2	2	0	2	4	110	58		60	325	283	13.48	14.43	730.57	1389.3	92.97	99.32	3.6	0.0568461	8.71	0.377591	4.948	0.0706271	9.42857	0.295243	0.438124	0.45465	0.04	17.3758	76.7113	16.4893	426	37179	4.96672
HF5C	5C	Phyllosphere	5	35	17.5908	96.3997	2018	75	2	0	0	0	0	23	32		27	140	150	13.15	13.92	261.03	235.02	92.97	99.32	3.6	0.0454769	7.07411	0.322122	4.35	0.0635644	4.85714	0.204501	0.0758483	0.21251	0.154087	28.2596	50.1849	37.2802	364.4	27046	5.39007
HR1A	1A	Rhizosphere	1	30	17.5882	96.3997	2210	3	4	0	0	0	1	41	40		41	247	254	13.42	13.72	1004.35	467.95	88.46	98.33	3.7	0.0568461	5.44162	0.207174	4.802	0.0164797	7.14286	0.275652	0.179641	0.239177	0.0952174	16.1347	32.2618	35.1295	49	29417	4.50438
HR1B	1B	Rhizosphere	1	30	17.5882	96.3997	2210	7	6	0	0	0	2	60	62		65	286	287	13.62	13.76	1597.78	863.34	88.46	98.33	3.8	0.108008	**	0.284028	41.22	0.0729814	38.5714	1.50721	3.45309	4.36543	0.219391	109.983	26.5263	295.374	116.07	85247	4.72332
HR1C	1C	Rhizosphere	1	30	17.5882	96.3997	2210	11	2	3	0	3	3	390	41	27	41	214	270	13.19	13.59	499.47	289.25	88.46	98.33	3.4	0.1478	13.6041	0.328136	7.838	0.0141254	12.8571	0.641944	0.630739	0.445761	0.0695652	23.7725	46.6003	48.0342	95.2	73927	4.85877
HR2A	2A	Rhizosphere	2	30	17.5906	96.3982	1978	29	8	0	0	0	2	260	41	51	55	327	305	13.54	14.46	237.3	364.72	94.35	99.18	4.4	0.0682153	8.16244	0.366229	5.361	0.0729814	11.1429	0.329412	2.21856	0.584856	0.104174	21.2902	64.5235	19.3571	347.4	64565	5.30539
HR2B	2B	Rhizosphere	2	30	17.5906	96.3982	1978	28	4	0	0	0	4	153	50		49	246	303	13.54	14.46	237.3	364.72	94.35	99.18	4	0.0454769	6.25787	0.274004	4.226	0.0776898	17.1429	0.177749	0.58483	0.302058	0.00495652	18.426	39.431	19.3571	291	26919	4.38734
HR2C	2C	Rhizosphere	2	30	17.5906	96.3982	1978	26	3	0	0	0	4	70	36		44	326	318	13.68	14.35	396.71	298.5	94.35	99.18	3.8	0.0682153	11.2234	0.424372	5.94	0.0965237	11.7143	0.368389	0.586826	0.360658	0.0553043	25.3	85.3144	25.0925	319.8	39106	4.83543
HR3A	3A	Rhizosphere	3	35	17.5903	96.4008	2178	33	8	0	0	0	2	186	57	51	59	230	200	13.2	14.03	1126.18	2249.09	89.04	99.11	3.5	0.113692	20.1015	0.711742	10.18	0.0376678	7.71429	0.275448	2.04691	0.668807	0.074087	47.2585	94.6345	28.6771	518.4	62337	4.90211
HR3B	3B	Rhizosphere	3	35	17.5903	96.4008	2178	38	2	2	2	0	2	28	42		47	216	228	13.23	14.13	776.39	1030.44	89.04	99.11	3.3	0.0568461	9.52284	0.912232	8.306	0.0188339	8.28571	0.383632	0.618762	0.38963	0.108609	25.5864	30.8279	29.394	442.9	116987	4.93682
HR3C	3C	Rhizosphere	3	35	17.5903	96.4008	2178	45	0	1	0	1	9	185	55	60	63	315		12.84	13.59	379.65	360.59	89.04	99.11	3.8	0.0454769	7.00508	0.217198	4.476	0.0470847	4.85714	0.19734	0.691617	0.360165	0.0293043	20.0491	57.3542	25.8094	291.7	92948	4.70036
HR4A	4A	Rhizosphere	4	35	17.5906	96.3993	2007	46	5	0	0	0	3	158	44		51	275	250	13.53	14.47	539.65	1817.05	95.94	98.88	3.7	0.0795845	10.6599	0.23992	7.72	0.0706271	11.4286	0.313657	0.897206	0.487243	0.0411304	24.6317	73.8436	27.9602	392.7	109605	4.87928
HR4B	4B	Rhizosphere	4	35	17.5906	96.3993	2007	51	3	0	0	0	0	21	30		35	195	186	13.24	14.25	188.46	179.42	95.94	98.88	3.3	0.0909537	30.7614	0.444421	22.75	0.0800441	27.1429	0.70046	0.97505	1.01185	0.202522	53.6551	72.4097	142.669	493.65
HR4C	4C	Rhizosphere	4	35	17.5906	96.3993	2007	55	3	0	0	0	4	205	36	42	56	253	252	13.32	14.5	395.29	1031.41	95.94	98.88	3.7	0.0397923	29.5431	0.600803	19.74	0.12242	20.8571	0.69422	2.65669	1.18914	0.0949565	42.1985	66.6743	50.9019	540	75310	5.1859
HR5A	5A	Rhizosphere	5	35	17.5908	96.3997	2018	62	3	0	0	0	3	37	32		40	276	298	13.11	13.94	375.27	297.75	92.97	99.32	3.4	0.0682153	31.3706	0.846739	21.93	0.0729814	16	0.482097	3.01896	1.01498	0.100261	91.6528	100.37	80.2959	345.15	55711	4.76673
HR5B	5B	Rhizosphere	5	35	17.5908	96.3997	2018	73	2	2	0	2	4	110	58		60	325	283	13.48	14.43	730.57	1389.3	92.97	99.32	3.6	0.0568461	8.71	0.377591	4.948	0.0706271	9.42857	0.295243	0.438124	0.45465	0.04	17.3758	76.7113	16.4893	426	65894	4.9599
HR5C	5C	Rhizosphere	5	35	17.5908	96.3997	2018	75	2	0	0	0	0	23	32		27	140	150	13.15	13.92	261.03	235.02	92.97	99.32	3.6	0.0454769	7.07411	0.322122	4.35	0.0635644	4.85714	0.204501	0.0758483	0.21251	0.154087	28.2596	50.1849	37.2802	364.4	61821	4.09517
HF10A	Control	Phyllosphere
HF10B	Control	Phyllosphere

## Sheet: ID_nomenclature
Nomenclature sample names
First letter	Second letter	Number	Third letter
Community	Sample type	Plot number	Individual number
B = Bacteria	S = Soil	1	* = no individual (soil sample)
H = Fungi	F = Phyllosphere	2	A
	R = Rhizosphere	3	B
		4	C
		5

## Sheet: Data_description
Variable	Type	Description
ID_sample	Categorical	Code to identify each sample. Each individual has 2 samples (phyllosphere and rhizosphere). See ID_nomenclature sheet for further explanation.
ID_individuo	Categorical	Code to identify each individual. Each plot has 3 individuals and a soil sample.
Sample_type	Categorical	Sample type (phyllosphere = leaf, rhizosphere = adjacent to the root soil, soil = bulk soil)
Plot	Categorical	Plot number (1-5, not in elevation order)
Coordenadas_N	Categorical	Latitude coordinates
Coordenadas_W	Categorical	Longitude coordinates
Elevation	Categorical	Elevation at which the plot was located (from 1978 to 2210 m above sea level)
Sterile_leaves	Numeric discrete	Number of sterile leaves
Fertile_leaves	Numeric discrete	Number of fertile leaves
Immature_sorus	Numeric discrete	Number of immature sorus
Mature_sorus	Numeric discrete	Number of mature sorus
Circinios	Numeric discrete	Circinious number
Height	Numeric continuous	Plant height (aprox) (m)
C_base	Numeric continuous	Base circumference (cm)
C_medio	Numeric continuous	Trunk circumference (cm)
C_apice	Numeric continuous	Apex circumference (cm)
Long_hojaNS	Numeric continuous	Leaf length
Long_OE	Numeric continuous	Longitud de
T_tot	Numeric continuous	Average temperature (C°)
T_jul	Numeric continuous	Average temperature july of 2021 (C°)
Light_tot	Numeric continuous	Average light (lux)
Light_jul	Numeric continuous	Average light july of 2021 (lux)
RH_tot	Numeric continuous	Average relative humidity (%)
RH_jul	Numeric continuous	Average relative humidity july of 2021 (%)
pH	Numeric continuous	pH
EC	Numeric continuous	Electrical conductivity
MO	Numeric continuous	Organic matter (%)
N	Numeric continuous	Nitrogen
Ctotal	Numeric continuous	Total carbon
Ptotal	Numeric continuous	Total phosphorus
P	Numeric continuous	Phosphorus
K	Numeric continuous	Potasium
Ca	Numeric continuous	Calcium
Mg	Numeric continuous	Magnesium
Na	Numeric continuous	Sodium
CIC	Numeric continuous	Cation-exchange capacity
NO3	Numeric continuous	Nitrites
NH4	Numeric continuous	Amonium
Fe	Numeric continuous	Iron
