# Supplementary material for: Changes in the phyllosphere and rhizosphere of a cloud forest tree fern along an elevation gradient
Source: Research Square preprint supplement (doi:10.21203/rs.3.rs-5374836/v1), 2024-11-15
Supplement: Supplementary file 3 [file 576c1f3ddb3ea1c2f4766c2a.xlsx]

## Sheet: Data
ID_sample	ID_individual	Sample_type	Plot	Transect	Coordinates_N	Coordinates_W	Elevation	Individual	Steriles	Fertiles	Immature_sorus	Mature_sorus	Circinios	Height	C_base	C_medio	C_apex	Length_hojaNS	Length_OE	T_tot	T_jul	Light_tot	Light_jul	RH_tot	RH_jul	pH	EC	MO	N	Ctotal	Ptotal	P	K	Ca	Mg	Na	CIC	NO3	NH4	Fe	Reads	Shannon
BS1	Sin_individuo	Soil	1	30	17.5882	96.3997	2210													13.41	13.69	1033.87	540.18	88.46	98.33	3.5	0.0795845	15.9848	0.443752	19.47	0.0306051	9.71429	0.393862	0.50499	0.589136	0.184696	33.1287	29.394	65.9574	260.5	102352	6.61352
BF1A	1A	Phyllosphere	1	30	17.5882	96.3997	2210	3	4	0	0	0	1	41	40		41	247	254	13.42	13.72	1004.35	467.95	88.46	98.33	3.7	0.0568461	5.44162	0.207174	4.802	0.0164797	7.14286	0.275652	0.179641	0.239177	0.0952174	16.1347	32.2618	35.1295	49	10210	4.19372
BF1B	1B	Phyllosphere	1	30	17.5882	96.3997	2210	7	6	0	0	0	2	60	62		65	286	287	13.62	13.76	1597.78	863.34	88.46	98.33	3.8	0.108008	**	0.284028	41.22	0.0729814	38.5714	1.50721	3.45309	4.36543	0.219391	109.983	26.5263	295.374	116.07	12114	4.41252
BF1C	1C	Phyllosphere	1	30	17.5882	96.3997	2210	11	2	3	0	3	3	390	41	27	41	214	270	13.19	13.59	499.47	289.25	88.46	98.33	3.4	0.1478	13.6041	0.328136	7.838	0.0141254	12.8571	0.641944	0.630739	0.445761	0.0695652	23.7725	46.6003	48.0342	95.2	18286	4.70691
BS2	Sin_individuo	Soil	2	30	17.5882	96.3997	1978													13.59	14.42	290.44	342.65	94.35	99.18	3.6	0.136431	9.52284	0.341502	7.529	0.089461	15.7143	0.254373	0.666667	0.477695	0.0773043	14.7981	109.69	25.0925	431.3	109881	7.13645
BF2A	2A	Phyllosphere	2	30	17.5906	96.3982	1978	29	8	0	0	0	2	260	41	51	55	327	305	13.54	14.46	237.3	364.72	94.35	99.18	4.4	0.0682153	8.16244	0.366229	5.361	0.0729814	11.1429	0.329412	2.21856	0.584856	0.104174	21.2902	64.5235	19.3571	347.4	28036	5.07439
BF2B	2B	Phyllosphere	2	30	17.5906	96.3982	1978	28	4	0	0	0	4	153	50		49	246	303	13.54	14.46	237.3	364.72	94.35	99.18	4	0.0454769	6.25787	0.274004	4.226	0.0776898	17.1429	0.177749	0.58483	0.302058	0.00495652	18.426	39.431	19.3571	291	25837	4.82987
BF2C	2C	Phyllosphere	2	30	17.5906	96.3982	1978	26	3	0	0	0	4	70	36		44	326	318	13.68	14.35	396.71	298.5	94.35	99.18	3.8	0.0682153	11.2234	0.424372	5.94	0.0965237	11.7143	0.368389	0.586826	0.360658	0.0553043	25.3	85.3144	25.0925	319.8	21873	4.80269
BS3	Sin_individuo	Soil	3	35	17.5903	96.4008	2178													13.09	13.92	760.74	1213.37	89.04	99.11	3.6	0.0682153	29.03	0.84206	21.28	0.0588559	10	0.6	1.51198	0.861399	0.2	45.1	52	63	406.2	104902	7.04828
BF3A	3A	Phyllosphere	3	35	17.5903	96.4008	2178	33	8	0	0	0	2	186	57	51	59	230	200	13.2	14.03	1126.18	2249.09	89.04	99.11	3.5	0.113692	20.1015	0.711742	10.18	0.0376678	7.71429	0.275448	2.04691	0.668807	0.074087	47.2585	94.6345	28.6771	518.4	11426	4.45135
BF3B	3B	Phyllosphere	3	35	17.5903	96.4008	2178	38	2	2	2	0	2	28	42		47	216	228	13.23	14.13	776.39	1030.44	89.04	99.11	3.3	0.0568461	9.52284	0.912232	8.306	0.0188339	8.28571	0.383632	0.618762	0.38963	0.108609	25.5864	30.8279	29.394	442.9	13709	4.45278
BF3C	3C	Phyllosphere	3	35	17.5903	96.4008	2178	45	0	1	0	1	9	185	55	60	63	315		12.84	13.59	379.65	360.59	89.04	99.11	3.8	0.0454769	7.00508	0.217198	4.476	0.0470847	4.85714	0.19734	0.691617	0.360165	0.0293043	20.0491	57.3542	25.8094	291.7	24032	4.94183
BS4	Sin_individuo	Soil	4	35	17.5903	96.4008	2007													13.36	14.41	374.47	1009.3	95.94	98.88	3.9	0.0341076	14.9645	0.59412	9.14	0.098878	4.57143	0.293453	0.202595	0.35144	-0.00608696	27.0185	101.804	37.2802	362.7	114608	7.00455
BF4A	4A	Phyllosphere	4	35	17.5906	96.3993	2007	46	5	0	0	0	3	158	44		51	275	250	13.53	14.47	539.65	1817.05	95.94	98.88	3.7	0.0795845	10.6599	0.23992	7.72	0.0706271	11.4286	0.313657	0.897206	0.487243	0.0411304	24.6317	73.8436	27.9602	392.7	21257	4.70905
BF4B	4B	Phyllosphere	4	35	17.5906	96.3993	2007	51	3	0	0	0	0	21	30		35	195	186	13.24	14.25	188.46	179.42	95.94	98.88	3.3	0.0909537	30.7614	0.444421	22.75	0.0800441	27.1429	0.70046	0.97505	1.01185	0.202522	53.6551	72.4097	142.669	493.65	19826	4.80503
BF4C	4C	Phyllosphere	4	35	17.5906	96.3993	2007	55	3	0	0	0	4	205	36	42	56	253	252	13.32	14.5	395.29	1031.41	95.94	98.88	3.7	0.0397923	29.5431	0.600803	19.74	0.12242	20.8571	0.69422	2.65669	1.18914	0.0949565	42.1985	66.6743	50.9019	540	14523	4.57286
BS5	Sin_individuo	Soil	5	35	17.5903	96.4008	2018													13.25	14.1	455.62	640.69	92.97	99.32	3.6	0.0454769	26.1878	0.683673	15.23	0.0753356	18	0.526445	2.52994	1.73564	0.0178261	50.6	81.0128	51.6188	439.65	92489	6.81507
BF5A	5A	Phyllosphere	5	35	17.5908	96.3997	2018	62	3	0	0	0	3	37	32		40	276	298	13.11	13.94	375.27	297.75	92.97	99.32	3.4	0.0682153	31.3706	0.846739	21.93	0.0729814	16	0.482097	3.01896	1.01498	0.100261	91.6528	100.37	80.2959	345.15
BF5B	5B	Phyllosphere	5	35	17.5908	96.3997	2018	73	2	2	0	2	4	110	58		60	325	283	13.48	14.43	730.57	1389.3	92.97	99.32	3.6	0.0568461	8.71	0.377591	4.948	0.0706271	9.42857	0.295243	0.438124	0.45465	0.04	17.3758	76.7113	16.4893	426	13863	4.67545
BF5C	5C	Phyllosphere	5	35	17.5908	96.3997	2018	75	2	0	0	0	0	23	32		27	140	150	13.15	13.92	261.03	235.02	92.97	99.32	3.6	0.0454769	7.07411	0.322122	4.35	0.0635644	4.85714	0.204501	0.0758483	0.21251	0.154087	28.2596	50.1849	37.2802	364.4
BR1A	1A	Rhizosphere	1	30	17.5882	96.3997	2210	3	4	0	0	0	1	41	40		41	247	254	13.42	13.72	1004.35	467.95	88.46	98.33	3.7	0.0568461	5.44162	0.207174	4.802	0.0164797	7.14286	0.275652	0.179641	0.239177	0.0952174	16.1347	32.2618	35.1295	49	107034	6.73472
BR1B	1B	Rhizosphere	1	30	17.5882	96.3997	2210	7	6	0	0	0	2	60	62		65	286	287	13.62	13.76	1597.78	863.34	88.46	98.33	3.8	0.108008	**	0.284028	41.22	0.0729814	38.5714	1.50721	3.45309	4.36543	0.219391	109.983	26.5263	295.374	116.07	68986	6.63331
BR1C	1C	Rhizosphere	1	30	17.5882	96.3997	2210	11	2	3	0	3	3	390	41	27	41	214	270	13.19	13.59	499.47	289.25	88.46	98.33	3.4	0.1478	13.6041	0.328136	7.838	0.0141254	12.8571	0.641944	0.630739	0.445761	0.0695652	23.7725	46.6003	48.0342	95.2	99700	6.81797
BR2A	2A	Rhizosphere	2	30	17.5906	96.3982	1978	29	8	0	0	0	2	260	41	51	55	327	305	13.54	14.46	237.3	364.72	94.35	99.18	4.4	0.0682153	8.16244	0.366229	5.361	0.0729814	11.1429	0.329412	2.21856	0.584856	0.104174	21.2902	64.5235	19.3571	347.4	129348	7.21275
BR2B	2B	Rhizosphere	2	30	17.5906	96.3982	1978	28	4	0	0	0	4	153	50		49	246	303	13.54	14.46	237.3	364.72	94.35	99.18	4	0.0454769	6.25787	0.274004	4.226	0.0776898	17.1429	0.177749	0.58483	0.302058	0.00495652	18.426	39.431	19.3571	291	129121	7.14692
BR2C	2C	Rhizosphere	2	30	17.5906	96.3982	1978	26	3	0	0	0	4	70	36		44	326	318	13.68	14.35	396.71	298.5	94.35	99.18	3.8	0.0682153	11.2234	0.424372	5.94	0.0965237	11.7143	0.368389	0.586826	0.360658	0.0553043	25.3	85.3144	25.0925	319.8	124976	7.14798
BR3A	3A	Rhizosphere	3	35	17.5903	96.4008	2178	33	8	0	0	0	2	186	57	51	59	230	200	13.2	14.03	1126.18	2249.09	89.04	99.11	3.5	0.113692	20.1015	0.711742	10.18	0.0376678	7.71429	0.275448	2.04691	0.668807	0.074087	47.2585	94.6345	28.6771	518.4	115338	7.17455
BR3B	3B	Rhizosphere	3	35	17.5903	96.4008	2178	38	2	2	2	0	2	28	42		47	216	228	13.23	14.13	776.39	1030.44	89.04	99.11	3.3	0.0568461	9.52284	0.912232	8.306	0.0188339	8.28571	0.383632	0.618762	0.38963	0.108609	25.5864	30.8279	29.394	442.9	86885	6.82823
BR3C	3C	Rhizosphere	3	35	17.5903	96.4008	2178	45	0	1	0	1	9	185	55	60	63	315		12.84	13.59	379.65	360.59	89.04	99.11	3.8	0.0454769	7.00508	0.217198	4.476	0.0470847	4.85714	0.19734	0.691617	0.360165	0.0293043	20.0491	57.3542	25.8094	291.7	98328	7.14625
BR4A	4A	Rhizosphere	4	35	17.5906	96.3993	2007	46	5	0	0	0	3	158	44		51	275	250	13.53	14.47	539.65	1817.05	95.94	98.88	3.7	0.0795845	10.6599	0.23992	7.72	0.0706271	11.4286	0.313657	0.897206	0.487243	0.0411304	24.6317	73.8436	27.9602	392.7	116932	6.99711
BR4B	4B	Rhizosphere	4	35	17.5906	96.3993	2007	51	3	0	0	0	0	21	30		35	195	186	13.24	14.25	188.46	179.42	95.94	98.88	3.3	0.0909537	30.7614	0.444421	22.75	0.0800441	27.1429	0.70046	0.97505	1.01185	0.202522	53.6551	72.4097	142.669	493.65	95568	6.51758
BR4C	4C	Rhizosphere	4	35	17.5906	96.3993	2007	55	3	0	0	0	4	205	36	42	56	253	252	13.32	14.5	395.29	1031.41	95.94	98.88	3.7	0.0397923	29.5431	0.600803	19.74	0.12242	20.8571	0.69422	2.65669	1.18914	0.0949565	42.1985	66.6743	50.9019	540	114701	6.98518
BR5A	5A	Rhizosphere	5	35	17.5908	96.3997	2018	62	3	0	0	0	3	37	32		40	276	298	13.11	13.94	375.27	297.75	92.97	99.32	3.4	0.0682153	31.3706	0.846739	21.93	0.0729814	16	0.482097	3.01896	1.01498	0.100261	91.6528	100.37	80.2959	345.15	109491	7.02472
BR5B	5B	Rhizosphere	5	35	17.5908	96.3997	2018	73	2	2	0	2	4	110	58		60	325	283	13.48	14.43	730.57	1389.3	92.97	99.32	3.6	0.0568461	8.71	0.377591	4.948	0.0706271	9.42857	0.295243	0.438124	0.45465	0.04	17.3758	76.7113	16.4893	426	106491	6.91493
BR5C	5C	Rhizosphere	5	35	17.5908	96.3997	2018	75	2	0	0	0	0	23	32		27	140	150	13.15	13.92	261.03	235.02	92.97	99.32	3.6	0.0454769	7.07411	0.322122	4.35	0.0635644	4.85714	0.204501	0.0758483	0.21251	0.154087	28.2596	50.1849	37.2802	364.4	103456	6.89653
BF10A	Control	Phyllosphere
BF10B	Control	Phyllosphere

## Sheet: ID_nomenclature
Nomenclature sample names
First letter	Second letter	Number	Third letter
Community	Sample type	Plot number	Individual number
B = Bacteria	S = Soil	1	* = no individual (soil sample)
H = Fungi	F = Phyllosphere	2	A
	R = Rhizosphere	3	B
		4	C
		5

## Sheet: Data_description
Variable	Type	Description
ID_sample	Categorical	Code to identify each sample. Each individual has 2 samples (phyllosphere and rhizosphere). See ID_nomenclature sheet for further explanation.
ID_individuo	Categorical	Code to identify each individual. Each plot has 3 individuals and a soil sample.
Sample_type	Categorical	Sample type (phyllosphere = leaf, rhizosphere = adjacent to the root soil, soil = bulk soil)
Plot	Categorical	Plot number (1-5, not in elevation order)
Coordenadas_N	Categorical	Latitude coordinates
Coordenadas_W	Categorical	Longitude coordinates
Elevation	Categorical	Elevation at which the plot was located (from 1978 to 2210 m above sea level)
Sterile_leaves	Numeric discrete	Number of sterile leaves
Fertile_leaves	Numeric discrete	Number of fertile leaves
Immature_sorus	Numeric discrete	Number of immature sorus
Mature_sorus	Numeric discrete	Number of mature sorus
Circinios	Numeric discrete	Circinious number
Height	Numeric continuous	Plant height (aprox) (m)
C_base	Numeric continuous	Base circumference (cm)
C_medio	Numeric continuous	Trunk circumference (cm)
C_apex	Numeric continuous	Apex circumference (cm)
Long_hojaNS	Numeric continuous	Leaf length
Long_OE	Numeric continuous	Length
T_tot	Numeric continuous	Average temperature (C°)
T_jul	Numeric continuous	Average temperature july of 2021 (C°)
Light_tot	Numeric continuous	Average light (lux)
Light_jul	Numeric continuous	Average light july of 2021 (lux)
RH_tot	Numeric continuous	Average relative humidity (%)
RH_jul	Numeric continuous	Average relative humidity july of 2021 (%)
pH	Numeric continuous	pH
EC	Numeric continuous	Electrical conductivity
MO	Numeric continuous	Organic matter (%)
N	Numeric continuous	Nitrogen
Ctotal	Numeric continuous	Total carbon
Ptotal	Numeric continuous	Total phosphorus
P	Numeric continuous	Phosphorus
K	Numeric continuous	Potasium
Ca	Numeric continuous	Calcium
Mg	Numeric continuous	Magnesium
Na	Numeric continuous	Sodium
CIC	Numeric continuous	Cation-exchange capacity
NO3	Numeric continuous	Nitrites
NH4	Numeric continuous	Amonium
Fe	Numeric continuous	Iron
Reads	Numeric discrete	Number or reads after quality filtering in DADA2
Shannon	Numeric continuous	Shannon Index
